# Supplementary material for: Dysregulation of Mitochondrial Dynamics and the Muscle Transcriptome in ICU Patients Suffering from Sepsis Induced Multiple Organ Failure
Source: PLoS One. 2008 Nov 10;3(11):e3686. doi: 10.1371/journal.pone.0003686 (PMC2579334; doi:10.1371/journal.pone.0003686)
Supplement: Supplemental data sheet S4 — Gene network lists. (0.10 MB XLS) [file pone.0003686.s009.xls]

## Sheet: MYC gene network list
© 2000-2007 Ingenuity Systems, Inc. All rights reserved.
Name	Synonyms	Description	Affymetrix/HUGO Gene Symbol	Fold Change	False Discovery Rate (q-value)	Location	Family	Drugs	Entrez Gene ID for Human	Entrez Gene ID for Mouse	Entrez Gene ID for Rat
ACSL4	9430020A05Rik, ACS4, AU018108, FACL4, LACS4, MRX63, MRX68	acyl-CoA synthetase long-chain family member 4	ACSL4	4.20993	0.288649	Cytoplasm	enzyme		2182	50790	113976
ANXA4	AI265406, AIV, Annexin 4, ANNEXIN A4, ANNEXIN IV, ANX4, AW106930, DKFZp686H02120, MGC75105, MGC93088, PIG28, Xanx-4	annexin A4	ANXA4	2.50341	0.44703	Plasma Membrane	other		307	11746	79124
CDCA7L	BC006933, DKFZp762L0311, JPO2, LOC619566, MGC11998, R1, RAM2	cell division cycle associated 7-like	CDCA7L	-2.99633	0	Nucleus	other		55536	217946	619566
CPD	AA960140, AW322530, CARBOXYPEPTIDASE D, D830034L15RIK, DKFZP564P046	carboxypeptidase D	CPD	2.25185	0.744184	Extracellular Space	peptidase		1362	12874	25306
CSPG4	4732461B14Rik, AN2, Condroitin sulfate proteoglycan, HMW-MAA, MCSP, MCSPG, MEL-CSPG, MSK16, NG2	chondroitin sulfate proteoglycan 4	CSPG4	5.51492	0	Plasma Membrane	other		1464	121021	81651
DHX36	2810407E23Rik, AI452301, AU022184, DDX36, Dhx36_predicted, KIAA1488, mKIAA1488, MLEL1	DEAH (Asp-Glu-Ala-His) box polypeptide 36	DHX36	3.40668	0.44703	Unknown	enzyme		170506	72162	310461
DKC1	BC068171, CBF5, DKC, DYSKERIN, MGC107501, NAP57, NOLA4, RP23-62O13.1, XAP101	dyskeratosis congenita 1, dyskerin	DKC1	3.22108	0.288649	Nucleus	enzyme		1736	245474	170944
EGLN1	AI503754, C1orf12, DKFZp761F179, ECYT3, HIFPH2, ORF13, PHD-2, SM-20, ZMYND6	egl nine homolog 1 (C. elegans)	EGLN1	3.40534	0.288649	Cytoplasm	enzyme		54583	112405	308913
EIF3A	A830012B05RIK, Csma, EIF3, EIF3-P170, eIF3-theta, EIF3S10, Elf3-P162, KIAA0139, mKIAA0139, P47, P167, p180, p185, TIF32, ZH12	eukaryotic translation initiation factor 3, subunit A	EIF3S10	2.36818	0.44703	Cytoplasm	translation regulator		8661	13669	292148
EIF3B	AL033316, AL033334, AL033369, AW208965, D12Mgi40, D5Wsu45e, EIF3-ETA, EIF3-P110, EIF3-P116, Eif3.9, EIF3S9, MGC104664, MGC112720, MGC131875, p116, PRT1	eukaryotic translation initiation factor 3, subunit B	EIF3S9	2.95165	0	Cytoplasm	translation regulator		8662	27979	288516
EIF3D	66/67kDa, AA407891, EIF3-P66, eIF3-zeta, EIF3S7, MGC17258, MGC93918, MGC115774, MGC126526, MOE1	eukaryotic translation initiation factor 3, subunit D	EIF3S7	2.17996	0.44703	Cytoplasm	translation regulator		8664	55944	362952
EPB41L2	4.1-G, AW555191, D10Ertd398e, DKFZp781D1972, DKFZp781H1755, Epb4.1l2, NBL2, RGD1563977_predicted	erythrocyte membrane protein band 4.1-like 2	EPB41L2	-3.18317	0	Plasma Membrane	other		2037	13822	309557
FBL	AL022665, FIB, FIBRILLARIN, FLRN, MGC116371, RNU3IP1	fibrillarin	FBL	2.014	0.744184	Nucleus	other		2091	14113	292747
GART	Adenosine3, AIRS, FTRG, Gaps, GARS, GARTF, MGC47764, PAIS, PGFT, PRGS	phosphoribosylglycinamide formyltransferase, phosphoribosylglycinamide synthetase, phosphoribosylaminoimidazole synthetase	GART	2.67186	0.288649	Cytoplasm	enzyme	LY231514	2618	14450	288259
GNL2	BC003262, dJ423B22.6, FLJ40906, HUMAUANTIG, MGC7863, MGC116342, Ngp-1, NUCLEOLAR GTPASE, RGD1305006	guanine nucleotide binding protein-like 2 (nucleolar)	GNL2	2.77252	0	Nucleus	enzyme		29889	230737	362593
HTATIP2	30kDa, AW111545, CC3, FLJ26963, Htatip2_predicted, TIP30	HIV-1 Tat interactive protein 2, 30kDa	HTATIP2	3.98291	0.288649	Nucleus	transcription regulator		10553	53415	292935
IMPA2	2210415D20Rik, AI326924, AW259601, MGC93085, Myo-inositol monophosphatase A2	inositol(myo)-1(or 4)-monophosphatase 2	IMPA2	2.17625	0.744184	Cytoplasm	phosphatase		3613	114663	282636
MGST3	2010012L10RIK, 2010306B17Rik, 2700004G04RIK, AA516734, GST-III, Mgst3_predicted	microsomal glutathione S-transferase 3	MGST3	-2.1367	0.744184	Cytoplasm	enzyme		4259	66447	289197
MYC	AU016757, C-MYC, C-MYC-P64, MGC105490, MGC138120, mMyc, Myc2, Niard, Nird, RNCMYC	v-myc myelocytomatosis viral oncogene homolog (avian)	MYC	9.34014	0	Nucleus	transcription regulator		4609	17869	24577
NAP1L1	AA407126, AI256722, D10Ertd68e, Dn38, FLJ16112, MGC8688, MGC23410, MGC72278, NAP, NAP-1, NAP1-LIKE, NAP1L, NRP	nucleosome assembly protein 1-like 1	1556121_at	4.48234	0	Nucleus	other		4673	53605	89825
NAT10	AI429152, ALP, DKFZp434C116, FLJ10774, FLJ12179, FLJ23850, hALP, KIAA1709, MGC25461, RP23-266F3.3	N-acetyltransferase 10	NAT10	2.34415	0.44703	Nucleus	enzyme		55226	98956
NOL5A	2310044F10Rik, MGC116301, NOP56	nucleolar protein 5A (56kDa with KKE/D repeat)	NOL5A	2.39525	0.44703	Nucleus	other		10528	67134	362214
PFKP	1200015H23Rik, 9330125N24Rik, FLJ40226, MGC105718, PFK-C, Pfk1c, PFKF, Phosphofructokinase 1 C, Phosphohexokinase	phosphofructokinase, platelet	PFKP	7.70964	0	Cytoplasm	kinase		5214	56421	60416
PLA1A	AA986889, PS-PLA1, Pspla1	phospholipase A1 member A	PLA1A	7.06324	0	Extracellular Space	enzyme		51365	85031	85311
PRMT3	2010005E20Rik, 2410018A17Rik, AL033309, HRMT1L3	protein arginine methyltransferase 3	PRMT3	2.33974	0.744184	Nucleus	enzyme		10196	71974	89820
Pseudouridylate synthase	5-ribosyluracil 5-phosphate synthetase, pseudouridine monophosphate synthetase, pseudouridylate synthetase, pseudouridylic acid synthetase, uracil hydro-lyase (adding D-ribose 5-phosphate), yUMP synthetase					Unknown	group
PUS1	A730013B20RIK, MGC11268, MGC112655, MLASA, MPUS1, mPus1p, Pus1p	pseudouridylate synthase 1	PUS1	2.59589	0.44703	Nucleus	enzyme		80324	56361	304567
RAB10	Ac1075, AW107754, RAS-RELATED GTP-BINDING PROTEIN	RAB10, member RAS oncogene family	RAB10	-2.95469	0	Cytoplasm	enzyme		10890	19325	50993
RIOK1	3110046C13Rik, 5430416A05Rik, AD034, AL033302, bA288G3.1, FLJ30006, MGC7300, MGC12903	RIO kinase 1 (yeast)	RIOK1	2.15781	0.744184	Unknown	kinase		83732	71340	291061
RSL1D1	2410005K20Rik, C76439, CATX11, CSIG, DKFZP564M182, L12, L12 protein, LOC302898, MGC138433, MGC142259, PBK1, PBK1 protein, YH77E09	ribosomal L1 domain containing 1	RSL1D1	2.07638	0.744184	Cytoplasm	other		26156	66409	302898
SERINC3	AA959945, AA960047, AIGP1, DIFF33, MGC94574, SBBI99, TDE, TDE1, TMS-1	serine incorporator 3	SERINC3	2.12229	0.744184	Cytoplasm	transporter		10955	26943	296350
SQRDL (includes EG:58472)	0610039J17Rik, 4930557M22Rik, CGI-44, Flavo-binding protein, SQRDL	sulfide quinone reductase-like (yeast)	SQRDL	2.75015	0.147385	Cytoplasm	enzyme		58472	59010
TKT	FLJ34765, p68, TKT1, TRANSKETOLASE	transketolase (Wernicke-Korsakoff syndrome)	TKT	4.05007	0	Cytoplasm	enzyme		7086	21881	64524
TRUB2	CLONE24922, G430055L02Rik, LOC366012, RP11-339B21.1	TruB pseudouridine (psi) synthase homolog 2 (E. coli)	TRUB2	2.08317	0.744184	Unknown	enzyme		26995	227682	366012
VARS	Bat-6, D17H6S56E, G7A, tRNA-valine synthetase, TrsVal, V-tRNA ligase, Valyl-tRNA synthetase, VARS2, Vrs	valyl-tRNA synthetase	VARS	3.42662	0	Cytoplasm	enzyme		7407	22321	25009

## Sheet: tgfb related gene nets
© 2000-2007 Ingenuity Systems, Inc. All rights reserved.
Name	Synonyms	Description	Affymetrix/HUGO Gene Symbol	Fold Change	False Discovery Rate (q-value)	Location	Family	Drugs	Entrez Gene ID for Human	Entrez Gene ID for Mouse	Entrez Gene ID for Rat
ABCA1	ABC-1, CERP, FLJ14958, HDLDT1, MGC164864, MGC165011, TGD	ATP-binding cassette, sub-family A (ABC1), member 1	ABCA1	2.92695	0.44703	Plasma Membrane	transporter		19	11303	313210
ADAM19 (includes EG:8728)	Adam19, AL024287, FKSG34, M[b], MADDAM, meltrin beta, MLTNB, Sox30_predicted	ADAM metallopeptidase domain 19 (meltrin beta)	ADAM19	-2.2999	0.744184	Plasma Membrane	peptidase		8728	11492	303068
AHCYL1	1110034F20Rik, AA409031, AA414901, ACHYL1, Ahcy-rs3, Ahcyl1_predicted, DCAL, IRBIT, PRO0233, XPVKONA	S-adenosylhomocysteine hydrolase-like 1	AHCYL1	3.21455	0	Cytoplasm	enzyme		10768	229709	362013
Alkaline Phosphatase	alkaline phenyl phosphatase, alkaline phosphohydrolase, alkaline phosphomonoesterase, Alp, Ap, glycerophosphatase, orthophosphoric-monoester phosphohydrolase (alkaline optimum), phosphomonoesterase					Unknown	group
C5ORF13	AI325076, D0H4S114, D4S114, Neuronal Protein 3.1, Nrep, P311, PRO1873, PTZ17, SEZ17	chromosome 5 open reading frame 13	C5orf13	-15.8846	0	Cytoplasm	other		9315	27528	338475
CEBPZ	AI848081, C/EBP ZETA, CBF, Cbf/hsp70, CBF2, CCAAT-binding factor, CEBPA-RS1, Cebpz_predicted, HSP-CBF, MGC36087, NOC1	CCAAT/enhancer binding protein zeta	CEBPZ	2.32589	0.44703	Nucleus	other		10153	12607	362686
CHRNA1	ACCHOR ALPHA, Acchor alpha-subunit, ACHR-1, ACHRA, ACHRD, Acra, AI385656, AI608266, CHOLINERGIC RECEPTOR, CHRNA, CMS2A, FCCMS, NACHR ALPHA 1, NICOTINIC ACETYLCHOLINE RECEPTOR ALPHA SUBUNIT 1, SCCMS	cholinergic receptor, nicotinic, alpha 1 (muscle)	CHRNA1	12.1825	0	Plasma Membrane	transmembrane receptor	ABT-089, isoflurane, mecamylamine, succinylcholine, rocuronium, doxacurium, amobarbital, mivacurium, pipecuronium, rapacuronium, metocurine, atracurium, cisatracurium, acetylcholine, nicotine, D-tubocurarine, arecoline, enflurane, pancuronium, vecuronium	1134	11435	79557
CHRND	AchR delta, Achr-4, ACHRD, Acrd, CMS2A, FCCMS, L10076, NACHR DELTA, SCCMS	cholinergic receptor, nicotinic, delta	CHRND	4.23242	0.147385	Plasma Membrane	transmembrane receptor	ABT-089, isoflurane, mecamylamine, succinylcholine, rocuronium, doxacurium, amobarbital, mivacurium, pipecuronium, rapacuronium, metocurine, atracurium, cisatracurium, acetylcholine, nicotine, D-tubocurarine, arecoline, enflurane, pancuronium, vecuronium	1144	11447	54240
COL1A2	AA960264, AI325291, ALPHA2(I) COLLAGEN, ALPHA2(I) PROCOLLAGEN, COLA2, COLLAGEN ALPHA2 TYPE1, COLLAGEN ALPHA2(I), COLLAGEN I, COLLAGEN TYPE I PRO ALPHA 2, COLLAGEN TYPE1 ALPHA2, OI4, oim, Pro-alpha2(i)collagen, PROCOLLAGEN ALPHA2(I), Procollagen type 1, prepro-alpha2 chain, Procollagen type1 alpha2 chain	collagen, type I, alpha 2	COL1A2	-2.92332	0.288649	Extracellular Space	other	collagenase	1278	12843	84352
COL3A1	Alpha coliii, AW550625, CN3, COL III, COL3 ALPHA, COLLAGEN ALPHA1(III), COLLAGEN III, Collagen Type 3, COLLAGEN TYPE 3, ALPHA 1 CHAIN, Collagen type iii, COLLAGEN TYPE III ALPHA 1, COLLAGEN TYPE III PRO ALPHA 1, EDS4A, FLJ34534, KIAA4231, MGC93704, mKIAA4231, MMS10-W, Ms10w, Procollagen type iii, PROCOLLAGEN TYPE III ALPHA1, Procollagen3 Alpha1, TYPE3 ALPHA1 PROCOLLAGEN	collagen, type III, alpha 1 (Ehlers-Danlos syndrome type IV, autosomal dominant)	COL3A1	-4.52561	0.147385	Extracellular Space	other	collagenase	1281	12825	84032
CST3	CYSC, Cystatin3, CYSTATIN C, MGC105556, MGC117328	cystatin C (amyloid angiopathy and cerebral hemorrhage)	CST3	3.00807	0.147385	Extracellular Space	other		1471	13010	25307
EDN1	BIG ENDOTHELIN1, ENDOTHELIN-1, ET-1, preproET	endothelin 1	EDN1	2.34968	0.744184	Extracellular Space	other		1906	13614	24323
EDNRB	ABCDS, AU022549, Ednra, ET-B, ETB RECEPTOR, ETBR, ETRB, GUSB, HSCR, HSCR2, Sox10m1	endothelin receptor type B	EDNRB	2.65919	0.744184	Plasma Membrane	G-protein coupled receptor	bosentan, sitaxsentan, atrasentan	1910	13618	50672
EIF4E2	4E-LP, 4EHP, 2700069E09Rik, AI036339, AV129531, D0H0S6743E, eIF-4E type 3, Eif4e2_predicted, EIF4EL3, IF4e	eukaryotic translation initiation factor 4E family member 2	EIF4E2	2.88692	0.44703	Cytoplasm	translation regulator		9470	26987	363275
Fgf	Fibroblast growth factor					Unknown	group
FOSL2	FLJ23306, FRA-2	FOS-like antigen 2	FOSL2	6.0419	0	Nucleus	transcription regulator		2355	14284	25446
GABPB2	BABPB2, E4TF1, E4TF1-47, E4TF1-53, E4TF1B, GABP BETA, GABP BETA1, GABP GAMMA, GABPB, GABPB1, GABPB1-1, GABPB1-2, MGC112921, Nrf-2beta, Nrf2b, NRF2B1, NRF2B2	GA binding protein transcription factor, beta subunit 2	GABPB2	2.50705	0.44703	Nucleus	transcription regulator		2553	14391	364738
HARS	Dnd1, FLJ20491, HRS, MMHRS	histidyl-tRNA synthetase	HARS	2.78758	0.288649	Cytoplasm	enzyme		3035	15115	307492
INHBB	ACTIVIN, activin AB beta polypeptide precursor, ACTIVIN B, Activin beta B, Beta-B, Inhibin B	inhibin, beta B	INHBB	11.2351	0	Extracellular Space	growth factor		3625	16324	25196
ITGB6	2210409C20Rik, 4831415H04Rik, Alpha-v beta-6 Integrin, INTEGRIN BETA 6, MGC94023	integrin, beta 6	ITGB6	-10.9544	0	Plasma Membrane	other		3694	16420	311061
JUNB	Jun-B Oncogene	jun B proto-oncogene	JUNB	2.67605	0.744184	Nucleus	transcription regulator		3726	16477	24517
NFIL3	AV225605, E4BP4, IL3BP1, NF-IL3A, NUCLEAR FACTOR, INTERLEUKIN 3 REGULATED	nuclear factor, interleukin 3 regulated	NFIL3	3.63426	0.744184	Nucleus	transcription regulator		4783	18030	114519
ODC1	MGC103389, ODC, ORNITHINE DECARBOXYLASE	ornithine decarboxylase 1	ODC1	2.4977	0.288649	Cytoplasm	enzyme	tazarotene, eflornithine	4953	18263	24609
PDGF BB	Pdgfb dimer					Unknown	complex
PLEKHA1	AA960558, C920009D07Rik, MGC156706, RGD1564153_predicted, TAPP1	pleckstrin homology domain containing, family A (phosphoinositide binding specific) member 1	PLEKHA1	2.64921	0.744184	Cytoplasm	other		59338	101476	361659
RDBP	D17H6S45, D6S45, NELF-E, RD, RDP	RD RNA binding protein	RDBP	2.75396	0.288649	Nucleus	other		7936	27632	294258
RPN2	1300012C06Rik, AV261018, RIBIIR, RIBOPHORIN II, RPN-II, SWP1	ribophorin II	RPN2	2.91115	0	Cytoplasm	enzyme		6185	20014	64701
SCD	AA589638, ab, AI265570, Delta9-desaturase, FADS5, MSTP008, PRO0998, SCD1, Stearoyl CoA desaturase 1, STEAROYL-COA DESATURASE, Stearyl CoA Destaurase	stearoyl-CoA desaturase (delta-9-desaturase)	SCD	6.56044	0.744184	Cytoplasm	enzyme		6319	20249	246074
SCN1B	GEFSP1, Na type i, beta, NAV1.2A BETA1, SODIUM CHANNEL BETA1, Sodium channel beta-1 subunit	sodium channel, voltage-gated, type I, beta	SCN1B	2.20122	0.44703	Plasma Membrane	ion channel	articaine/epinephrine, articaine, bupivacaine/lidocaine, epinephrine/prilocaine, epinephrine/lidocaine, fosphenytoin, phenytoin, prilocaine, lidocaine, riluzole, penicillin g/procaine, procaine	6324	20266	29686
SLC39A4 (includes EG:55630)	1600025H15Rik, AEZ, AU041686, AWMS2, FLJ20327, MGC156705, MGC74741, SLC39A4, Slc39a4_predicted, ZIP4	solute carrier family 39 (zinc transporter), member 4	SLC39A4	2.46013	0.44703	Plasma Membrane	transporter		55630	72027	300051
Tgf beta	LAP, Tgfb					Unknown	group
TGFB3	ARVD, FLJ16571, MGC105479, MGC118722, TGF BETA 3	transforming growth factor, beta 3	TGFB3	4.08828	0.147385	Extracellular Space	growth factor		7043	21809	25717
TOB1	APRO6, MGC34446, MGC104792, PIG49, TOB, TROB, TROB1	transducer of ERBB2, 1	TOB1	-3.2082	0.147385	Nucleus	transcription regulator		10140	22057	170842
UBE2D1	E2 H5A, E2(17)KB1, MGC28550, SFT, UBC5, UBC4/5, UBC5A, UBCH5, UBCH5A, Ube2d1_predicted	ubiquitin-conjugating enzyme E2D 1 (UBC4/5 homolog, yeast)	UBE2D1	-3.18316	0.44703	Cytoplasm	enzyme		7321	216080	361831
Ubiquitin	Polyubiquitin					Unknown	group

## Sheet: ers1 related net
© 2000-2007 Ingenuity Systems, Inc. All rights reserved.
Name	Synonyms	Description	Affymetrix/HUGO Gene Symbol	Fold Change	False Discovery Rate (q-value)	Location	Family	Drugs	Entrez Gene ID for Human	Entrez Gene ID for Mouse	Entrez Gene ID for Rat
ABCB6	1200005B17Rik, ABC, ABC14, EST45597, FLJ22414, MGC93242, MTABC3, PRP, umat	ATP-binding cassette, sub-family B (MDR/TAP), member 6	ABCB6	2.3642	0.744184	Cytoplasm	transporter		10058	74104	140669
ADAMTS1	ADAMTS, C3-C5, KIAA1346, METH-1	ADAM metallopeptidase with thrombospondin type 1 motif, 1	ADAMTS1	3.12392	0.744184	Extracellular Space	peptidase		9510	11504	79252
Ahr-aryl hydrocarbon-Arnt						Unknown	complex
CD82	4F9, AA682076, AL023070, C33, C33 antigen, GR15, IA4, KAI1, Kangai1, R2, SAR2, ST6, TSPAN27	CD82 molecule	CD82	3.53138	0.744184	Plasma Membrane	other		3732	12521	83628
CTSD	CATD, CATHEPSIN D, CD, CLN10, CPSD, LOC196214, MGC2311	cathepsin D	CTSD	4.20671	0.288649	Cytoplasm	peptidase		1509	13033	171293
CXXC1	2410002I16Rik, 5830420C16Rik, AI426635, CFP1, CGBP, hCGBP, HsT2645, PCCX1, PHF18, SPP1	CXXC finger 1 (PHD domain)	CXXC1	2.1865	0.44703	Nucleus	transcription regulator		30827	74322	291440
Cyclin B	Cyclin B protein					Unknown	group
DNA-directed RNA polymerase	C ribonucleic acid formation factors, C RNA formation factors, deoxyribonucleic acid-dependent ribonucleic acid polymerase, DNA-dependent ribonucleate nucleotidyltransferase, DNA-dependent RNA nucleotidyltransferase, DNA-dependent RNA polymerase, nucleoside-triphosphate:RNA nucleotidyltransferase (DNA-directed), ribonucleate nucleotidyltransferase, ribonucleate polymerase, ribonucleic acid nucleo…					Unknown	group
DRAP1	2310074H19Rik, Drap1_predicted, MGC156767, NC2-ALPHA, negative cofactor 2 alpha	DR1-associated protein 1 (negative cofactor 2 alpha)	DRAP1	2.10053	0.744184	Nucleus	transcription regulator		10589	66556	293674
ESR1	AA420328, Alpha estrogen receptor, AU041214, DKFZp686N23123, ER, ER66, ER ALPHA, Er alpha (46 kDa isoform), ER[a], ERA, ESR, ESRA, ESTR, ESTRA, ESTROGEN RECEPTOR1, ESTROGEN RECEPTOR ALPHA, NR3A1, RNESTROR, TERP-1	estrogen receptor 1	ESR1	-2.99139	0	Nucleus	ligand-dependent nuclear receptor	17-alpha-ethinylestradiol, fulvestrant, beta-estradiol, estradiol 17beta-cypionate, estrone, estradiol valerate, 3-(4-methoxy)phenyl-4-((4-(2-(1-piperidinyl)ethoxy)phenyl)methyl)-2H-1-benzopyran-7-ol, bazedoxifene, estradiol valerate/testosterone enanthate, TAS-108, ethinyl estradiol/ethynodiol diacetate, estradiol acetate, esterified estrogens, estradiol cypionate/medroxyprogesterone acetate, co…	2099	13982	24890
FASN	A630082H08Rik, FAS, FATTY ACID SYNTHASE, FATTY ACID SYNTHETASE, Long chain fatty acyl-coa synthetase, MGC14367, MGC15706, NADP Dependent Oxidoreductase, OA-519	fatty acid synthase	FASN	7.27286	0.147385	Cytoplasm	enzyme		2194	14104	50671
GADD45A	AA545191, DDIT1, Gadd, GADD45	growth arrest and DNA-damage-inducible, alpha	GADD45A	9.86751	0	Nucleus	other		1647	13197	25112
GORASP1	5430411C10Rik, FLJ23443, GOLPH5, GRASP65, MGC118894, MGC118897, P65	golgi reassembly stacking protein 1, 65kDa	GORASP1	2.18006	0.44703	Cytoplasm	other		64689	74498	56082
Histone h3	H3, H3.3, Histone H3 protein					Unknown	group
IGF2R	AI661837, CD222, Ci M6pr, CI-MPR, Igf-II/mpr, Igfr2, M6P-R, M6P/IGF2R, MANNOSE-6-PHOSPHATE RECEPTOR, Mpr, MPR300, MPRI, TYPE 2 IGF RECEPTOR, Type 2 insulin-like growth factor receptor	insulin-like growth factor 2 receptor	IGF2R	3.29392	0.147385	Plasma Membrane	transmembrane receptor		3482	16004	25151
MAFF	Maff_predicted, U-MAF	v-maf musculoaponeurotic fibrosarcoma oncogene homolog F (avian)	MAFF	9.03981	0	Nucleus	transcription regulator		23764	17133	366960
MED1	AI480703, ARC205, CRSP1, CRSP200, CRSP205, CRSP210, DRIP205, DRIP230, MED220, MGC71488, MGC90617, PBP, PPARBP, PPARGBP, RB18A, RGD1559552_predicted, TRAP220, TRIP2	mediator complex subunit 1	PPARBP	2.91992	0.44703	Nucleus	transcription regulator		5469	19014	497991
MED16	95kDa, A630083L04, DRIP92, MED95, THRAP5, Thrap5_predicted, TRAP95	mediator complex subunit 16	THRAP5	2.13734	0.744184	Nucleus	transcription regulator		10025	216154	299607
MT1E	METALLOTHIONEIN 1, Metallothionein2, Mt, MT-I, MT1, Mt1a, Mt2, MTD, Thionein	metallothionein 1E	MT1E	5.25436	0	Cytoplasm	other		4493	17748	24567
Nuclear factor 1	Nf1, Nf1/L, Nf1/Red1, Nfi					Unknown	group
POLR1C	40kDa, AA409007, AA959927, Ac2-127, AL024089, MGC105583, MGC161175, POLR1E, RP3-337H4.4, RPA5, RPA39, RPA40, RPAC1, Rpo1-1	polymerase (RNA) I polypeptide C, 30kDa	POLR1C	2.82618	0.288649	Nucleus	enzyme		9533	20016	301246
POLR3E	KIAA1452, Polr3e_predicted, RGD1308086, RPC5, SIN	polymerase (RNA) III (DNA directed) polypeptide E (80kD)	POLR3E	2.77372	0	Nucleus	transcription regulator		55718	26939	361640
POLRMT	1110018N15RIK, 4932416K13, APOLMT, h-mtRPOL, MGC118526, MTRNA POLYMERASE, MTRPOL, Polrmt_predicted, POLYMERASE MITOCHONDRIAL	polymerase (RNA) mitochondrial (DNA directed)	POLRMT	2.95772	0	Cytoplasm	enzyme		5442	216151	299604
RBBP5	4933411J24Rik, C330016J05, Rbbp5_predicted, RBQ3, SWD1	retinoblastoma binding protein 5	RBBP5	2.32137	0.744184	Nucleus	other		5929	213464	304794
RBM9	2810460A15Rik, AA407676, AI118529, dJ106I20.3, FBM2, Fox-2, Fxh, HRNBP2, MGC156775, Rbm9 (predicted), Rbm9_predicted, RTA	RNA binding motif protein 9	RBM9	-2.48217	0.44703	Nucleus	transcription regulator		23543	93686	362950
RNA polymerase II	POL II, Polymerase II, RNA POL II, RNAPII, RPase2					Unknown	complex
SETD2	4921524K10RIK, BC031601, FLJ16420, FLJ22472, FLJ23184, FLJ45883, HIF-1, HSPC069, HYPB, KIAA1732, Kif9_predicted	SET domain containing 2	SETD2	2.16488	0.744184	Cytoplasm	enzyme		29072	235626	316013
SF3A1	1200014H24Rik, 5930416L09Rik, AI159724, PRP21, PRPF21, SAP114, SAP120, SF3A120, SF3A p120, Sf3a1_predicted	splicing factor 3a, subunit 1, 120kDa	SF3A1	2.17289	0.288649	Nucleus	other		10291	67465	305479
SF3A2	66kDa, AW047242, PRP11, PRPF11, SAP62, SF3A66, SFA66	splicing factor 3a, subunit 2, 66kDa	SF3A2	3.09828	0.44703	Nucleus	other		8175	20222	299620
SLC25A5	2F1, Adenine nucleotide translocator 2, Adp, atp carrier protein, ADP/ATP CARRIER PROTEIN, ANC2, ANT2, Fibroblast ATP/ADP Carrier, MGC101927, T2, T3	solute carrier family 25 (mitochondrial carrier; adenine nucleotide translocator), member 5	SLC25A5	3.04099	0.44703	Cytoplasm	transporter		292	11740	25176
SLC35A2	AI327289, Had-1, Sfc8, UGALT, UGAT, UGT, UGT1, UGT2, UGTL	solute carrier family 35 (UDP-galactose transporter), member A2	SLC35A2	2.47702	0.44703	Cytoplasm	transporter		7355	22232
SPEN	KIAA0929, LOC365981, MINT, mKIAA0929, RP1-134O19.1, SHARP	spen homolog, transcriptional regulator (Drosophila)	SPEN	3.44984	0.288649	Nucleus	transcription regulator		23013	56381	365981
TAF1B	4930408G01Rik, A230108M10RIK, LOC690450, MGC:9349, mTAFI68, RAF1B, RAFI63, SL1, TAFI63, TAFI68, Tafi86, TIF1B	TATA box binding protein (TBP)-associated factor, RNA polymerase I, B, 63kDa	TAF1B	2.33068	0.744184	Nucleus	transcription regulator		9014	21340	690450
TBL1X	5330429M20, EBI, RGD1563868, TBL1, Tbl1x_predicted	transducin (beta)-like 1X-linked	TBL1X	2.46504	0.44703	Plasma Membrane	other		6907	21372	302711
TP63	AI462811, AIS, B(p51A), B(p51B), CLIMP63, DELTA N p63, Delta N p63 Alpha, Delta N p63 gamma, EEC3, KET, LMS, MGC115972, OFC8, p51, p51/p63, P63, p63 alpha isoform, p63 gamma isoform, p73H, P73L, RHS, SHFM4, TAp63, TP73L, Trp53rp1, Trp63	tumor protein p63	TP73L	2.18537	0.744184	Nucleus	transcription regulator		8626	22061	246334

## Sheet: IL6 mir21 gene network
© 2000-2007 Ingenuity Systems, Inc. All rights reserved.
Name	Synonyms	Description	Fold Change	False Discovery Rate (q-value)	Location	Family	Drugs	Entrez Gene ID for Human	Entrez Gene ID for Mouse	Entrez Gene ID for Rat
ACSBG1	BG, BG1, BGM, E230019G03Rik, FLJ30320, GR-LACS, hBG1, hsBG, KIAA0631, Lpd, MGC14352, mKIAA0631, R75185	acyl-CoA synthetase bubblegum family member 1	2.07365	0.44703	Cytoplasm	enzyme		23205	94180	171410
CANT1	5830420C20Rik, APY1H, D11Bwg0554e, Entpd8, SCAN-1, SHAPY, srapy	calcium activated nucleotidase 1	2.0027	0.744184	Extracellular Space	enzyme		124583	76025	246272
CD82	4F9, AA682076, AL023070, C33, C33 antigen, GR15, IA4, KAI1, Kangai1, R2, SAR2, ST6, TSPAN27	CD82 molecule	3.53138	0.744184	Plasma Membrane	other		3732	12521	83628
CIB1	Calcium and integrin bind. protein 1, CALMYRIN, CIB, Cibkip, KIP, Prkdcip, SIP2-28	calcium and integrin binding 1 (calmyrin)	2.55463	0.147385	Nucleus	other		10519	23991	81823
CSE1L	2610100P18Rik, AA407533, Capts, CAS, CELL APOPTOSIS SUSCEPTIBILITY PROTEIN, CSE1, MGC117283, MGC130036, MGC130037, XPO2	CSE1 chromosome segregation 1-like (yeast)	1.76785	2.07926	Nucleus	transporter		1434	110750	362273
CTPS	CTP A, CTP Synthetase	CTP synthase	4.48131	0	Nucleus	enzyme		1503	51797	313560
EDD1	4432411E13Rik, AW549941, C77315, D030042K14, DD5, EDD, FLJ11310, HYD, KIAA0896, MGC57263, mKIAA0896, Rat100	E3 ubiquitin protein ligase, HECT domain containing, 1	2.48639	2.07926	Nucleus	enzyme		51366	70790	117060
EIF3S10	A830012B05Rik, Csma, EIF3, EIF3-P170, eIF3-theta, EIF3A, Elf3-P162, KIAA0139, mKIAA0139, P167, p180, p185, P47, ZH12	eukaryotic translation initiation factor 3, subunit 10 theta, 150/170kDa	2.36818	0.44703	Cytoplasm	translation regulator		8661	13669	292148
EIF4A1	BM-010, DDX2A, EIF-4A, EIF4	eukaryotic translation initiation factor 4A, isoform 1	4.19152	0	Cytoplasm	translation regulator		1973	13681	287436
EIF4E	CAP-BINDING PROTEIN, CBP, Eif4e-ps, EIF4E1, EIF4EL1, EIF4F, IF4E, MGC103177, MGC111573, MGC134278, MGC93265	eukaryotic translation initiation factor 4E	1.50992	11.3205	Cytoplasm	translation regulator		1977	13684	117045
EIF4G1	DKFZp686A1451, E030015G23Rik, EIF4F, EIF4G, EIF4GI, EUKARYOTIC PROTEIN SYNTHESIS INITIATION FACTOR, MGC37551, MGC90776, p220	eukaryotic translation initiation factor 4 gamma, 1	1.90488	1.29278	Cytoplasm	translation regulator		1981	208643	287986
F2	ALPHA-THROMBIN, Cf-2, DCP, FII, Meizothrombin Des-Fragment 1, PROTHROMBIN, PT, THROMBIN	coagulation factor II (thrombin)		Extracellular Space	peptidase	enoxaparin, desirudin, dabigatran etexilate, argatroban, bivalirudin, lepirudin	2147	14061	29251
FAM46A	BC023892, C6orf37, D930050G01Rik, FLJ20037, FLJ31495, RGD1311381, XTP11	family with sequence similarity 46, member A	2.24743	3.37367	Unknown	other		55603	212943	300870
FGL2	AI385601, FIBRINOGEN-LIKE 2, FIBROLEUKIN, musfiblp, pT49, T49	fibrinogen-like 2	-2.85323	0.44703	Extracellular Space	peptidase		10875	14190	84586
GP1BB	CD42C, GP1B BETA, GP1BP	glycoprotein Ib (platelet), beta polypeptide		Plasma Membrane	G-protein coupled receptor		2812	14724	116727
IARS (includes EG:3376)	2510016L12Rik, AI327140, AU044614, E430001P04RIK, FLJ20736, Iars, ILE TRNA SYNTHASE, ILRS, IRS, ISOLEUCYL TRNA SYNTHETASE, PRO0785	isoleucine-tRNA synthetase		Cytoplasm	enzyme		3376	105148	306804
IL6	BSF2, FDGI, HGF, HSF, IFN BETA 2A, IFNB2, ILg6, INTERLEUKIN 6	interleukin 6 (interferon, beta 2)	1.7503	26.4557	Extracellular Space	cytokine		3569	16193	24498
IL6R	CD126, GP80, IL-6R-1, IL6 RECEPTOR, IL6R ALPHA, IL6RA, MGC30256, MGC104991	interleukin 6 receptor	10.6436	0.44703	Plasma Membrane	transmembrane receptor		3570	16194	24499
JTV1	AA407136, AA407225, AIMP2, Loc288480, MGC30261, MGC36346, MGC36522, MGC37389, MGC125271, MGI:2385237, P38, p38 tRNA synthetase complex component, PRO0992	JTV1 gene		Plasma Membrane	other		7965	231872	288480
KPNA1	AW494490, importin alpha 5, Importin alpha1, IPOA5, KAP ALPHA1, MSRP1, NPI-1, RAG cohort protein 2, RCH2, serine-rich RNA polymerase suppressor protein 1, SRP1	karyopherin alpha 1 (importin alpha 5)	2.13779	1.29278	Nucleus	transporter		3836	16646	288064
LARS	2310045K21Rik, 3110009L02Rik, AW536573, FLJ10595, FLJ21788, hr025Cl, HSPC192, KIAA1352, LARS1, LEURS, LEUS, LRS, MGC105585, mKIAA1352, PIG44, RNTLS	leucyl-tRNA synthetase	1.77335	2.07926	Cytoplasm	enzyme		51520	107045	291624
LMNB1	LAMIN B, LAMIN B1, LMN, LMN2, LMNB, MGC111419	lamin B1	1.13359	40.7922	Nucleus	other		4001	16906	116685
MARS (includes EG:4141)	FLJ35667, Mars, METRS, MGC90747, MRS, MTRNS	methionine-tRNA synthetase	2.4386	0.744184	Cytoplasm	enzyme		4141	216443	299851
MIRN21 (includes EG:406991)	HSA-MIR-21, MIR-021, miR-21, MIRN21	microRNA 21	5.04294	0.288649	Unknown	other		406991
MIRN30A (includes EG:407029)	hsa-mir-30a, MIR-30, MIR-30A, MIR30A3P, MIRN30A	microRNA 30a		Unknown	other		407029
MLF1	HLS7	myeloid leukemia factor 1	-4.64273	0	Nucleus	other		4291	17349	310483
PRKCB1	A130082F03Rik, MGC41878, PKC BETA, PKC BETA 1, Pkc beta 2, PKC Type II, PKC Type III, PKCB, PkcbetaII, PRKCB, PRKCB2	protein kinase C, beta 1	1.50406	11.3205	Cytoplasm	kinase	enzastaurin, ruboxistaurin	5579	18751	25023
PRKCBP1	1110013E22Rik, 2010005I16Rik, 3632413B07Rik, AI316811, AL024039, MGC25852, MGC31836, mKIAA1125, PKC BINDING PROTEIN 1, PRO2893, RACK7, SE14-3, ZMYND8	protein kinase C binding protein 1	2.34937	1.29278	Nucleus	transcription regulator		23613	228880	296374
PSME3	AA410043, AU020960, Ki, MGC109065, PA28-gamma, PA28G, REG-GAMMA	proteasome (prosome, macropain) activator subunit 3 (PA28 gamma; Ki)	2.32558	0.288649	Cytoplasm	peptidase		10197	19192	287716
QARS	1110018N24Rik, 1200016L19Rik, C80286, GLNRS, GLUTAMINYL TRANSSYNTHASE, Glutaminyl-tRNA synthetase, MGC105238, MGC94241, PRO2195, QRS	glutaminyl-tRNA synthetase	-1.02409	48.6564	Cytoplasm	enzyme		5859	97541	290868
RAP1B	2810443E11Rik, DKFZp586H0723, K-REV, MGC93206, RAL1B	RAP1B, member of RAS oncogene family	1.36611	5.19491	Cytoplasm	enzyme		5908	215449	171337
RARS	2610011N19Rik, 2610037E21Rik, AL033339, Arginyl-tRNA synthetase, ARGRS, AW985894, Cytoplasmic tRNA Synthetase, DALRD1, MGC8641, RRS	arginyl-tRNA synthetase	2.66658	1.29278	Cytoplasm	enzyme		5917	104458	287191
SOD2	IPO-B, MGC128371, MGC6144, Mn superoxide dismutase, MNSOD	superoxide dismutase 2, mitochondrial	16.3337	0	Cytoplasm	enzyme		6648	20656	24787
UCK2 (includes EG:7371)	AA407809, AI481316, AU018180, AU020720, TSA903, UCK2, UK, UMK, UMPK	uridine-cytidine kinase 2	3.28392	0.147385	Cytoplasm	kinase		7371	80914	304944
XPO5	2410004H11Rik, 2700038C24Rik, AI648907, AW549301, Exp5, FLJ14239, FLJ32057, FLJ45606, KIAA1291, mKIAA1291, RanBp21	exportin 5	2.08831	0.744184	Nucleus	transporter		57510	72322	363194
YWHAZ	1110013I11Rik, 14-3-3 S1, 14-3-3-ZETA, 14-3-3z, AI596267, AL022924, AU020854, KCIP-1, MGC111427, MGC126532, MGC138156, Tyr mono, TYROSINE 3-MONOOXYGENASE ZETA POLYPEPTIDE, YMHAZ	tyrosine 3-monooxygenase/tryptophan 5-monooxygenase activation protein, zeta polypeptide		Cytoplasm	enzyme		7534	22631	25578

## Sheet: nrf2 oxidative stress
© 2000-2007 Ingenuity Systems, Inc. All rights reserved.
Name	Fold Change	False Discovery Rate (q-value)	Synonyms	Description	Affymetrix/HUGO Gene Symbol	Location	Family	Drugs	Entrez Gene ID for Human	Entrez Gene ID for Mouse	Entrez Gene ID for Rat
Actin						Unknown	group
Actin-Nrf2						Unknown	complex
AFAR						Unknown	group
AKR			2610201A18Rik, Akr1a4, Akra, ALDEHYDE REDUCTASE, ALDR1, ALR, DD3, MGC12529, MGC1380	aldo-keto reductase family 1, member A1 (aldehyde reductase)		Cytoplasm	enzyme		10327	58810	78959
AKT	1.12289	32.4514	AKT, MGC99656, PKB, PKB ALPHA, PKB/AKT, PRKBA, Protein kinase B, RAC, RAC-ALPHA, Thymoma viral proto-oncogene 1	v-akt murine thymoma viral oncogene homolog 1	AKT1	Cytoplasm	kinase	enzastaurin	207	11651	24185
AOX1	3.96277	3.37367	AI196512, AI255253, ALDEHYDE OXIDASE, AO, AOH1, Aox-2, MGC13774, Moro, RO, XD	aldehyde oxidase 1	AOX1	Cytoplasm	enzyme		316	11761	54349
ASK1			7420452D20Rik, ASK, ASK1, MAPKKK5, MEKK5, MGC141518, MGC141519, RGD1306565_predicted	mitogen-activated protein kinase kinase kinase 5		Cytoplasm	kinase		4217	26408	365057
ATF4	-0.995015	48.6564	C/ATF, CREB-2, MGC96460, TAXREB67, TXREB	activating transcription factor 4 (tax-responsive enhancer element B67)	ATF4	Nucleus	transcription regulator		468	11911	79255
BACH1	2.13451	2.07926	6230421P05RIK, AI323795, Bach1_predicted, C21ORF41	BTB and CNC homology 1, basic leucine zipper transcription factor 1	BACH1	Nucleus	transcription regulator		571	12013	304127
c-Fos	-1.00406	48.6564	C-FOS, D12Rfj1, V-FOS	v-fos FBJ murine osteosarcoma viral oncogene homolog	FOS	Nucleus	transcription regulator		2353	14281	314322
c-MAF	-3.26206	0.288649	2810401A20Rik, A230108G15RIK, AW047063, C-MAF, Maf2, MGC71685	v-maf musculoaponeurotic fibrosarcoma oncogene homolog (avian)	229327_s_at	Nucleus	transcription regulator		4094	17132	54267
c-Raf	1.56433	5.19491	6430402F14Rik, AA990557, BB129353, C-RAF, C-RAF1, D830050J10Rik, MGC102375, MURINE LEUKEMIA VIRAL ONCOGENE HOMOLOG1, Raf, RAF KINASE, v-Raf	v-raf-1 murine leukemia viral oncogene homolog 1	RAF1	Cytoplasm	kinase	sorafenib	5894	110157	24703
CAT			2210418N07, Cas-1, CATALASE, Catalase1, Cs-1, MGC138422, MGC138424, RATCAT01, RATCATL	catalase		Cytoplasm	enzyme		847	12359	24248
CBP/p300			CBP			Unknown	group
CBR1	1.73505	5.19491	AW261796, Carbonyl Reductase, CBR, CR, hCBR1, MGC124927, Ocr	carbonyl reductase 1	CBR1	Cytoplasm	enzyme		873	12408	29224
CCT7	2.08335	0.744184	AA408524, AL022769, CCT-ETA, Cct7_predicted, Ccth, Cctz, Chaperonin subunit 7, MGC110985, Nip7-1, TCP-1-eta	chaperonin containing TCP1, subunit 7 (eta)	CCT7	Cytoplasm	other		10574	12468	297406
CLPP	1.12883	32.4514	AU019820, D17Wsu160e, LOC301117	ClpP caseinolytic peptidase, ATP-dependent, proteolytic subunit homolog (E. coli)	CLPP	Cytoplasm	peptidase		8192	53895	301117
CUL3			AI467304, AW146203, Cul3_predicted, mKIAA0617	cullin 3		Nucleus	enzyme		8452	26554	301555
Cul3-Roc1						Unknown	complex
CYP1A/2A/3A/4A/2C						Unknown	group
ElectophilesROS			oxygen and reactive oxygen species, reactive oxygen metabolites, ROI, ROS			Unknown	chemical toxicant
EPHX1	3.54555	0.288649	AI195553, Eph-1, EPHX, EPOX, Epoxide Hydrolase, EPXH1, MEH, MEH8	epoxide hydrolase 1, microsomal (xenobiotic)	EPHX1	Cytoplasm	peptidase		2052	13849	25315
ERK1/2						Unknown	group
ERK5	1.72683	2.07926	BMK, BMK1, ERK4, ERK5, Erk5-T, ERK7, PRKM7	mitogen-activated protein kinase 7	MAPK7	Cytoplasm	kinase		5598	23939	114509
ERP29	1.21896	15.5629	1200015M03Rik, 2810446M09Rik, AW209030, C12orf8, ERp28, ERp31, PDI-DB	endoplasmic reticulum protein 29	ERP29	Cytoplasm	transporter		10961	67397	117030
FKBP5	5.06538	2.07926	51kDa, AIG6, D17Ertd592e, Dit1, FKBP51, Fkbp51/54, FKBP54, MGC111006, P54, PPIase, Ptg-10	FK506 binding protein 5	FKBP5	Nucleus	enzyme		2289	14229	361810
FMO1	-1.35876	42.5486	Flavin-containing monooxygenase, RFMO1A	flavin containing monooxygenase 1	FMO1	Cytoplasm	enzyme		2326	14261	25256
FRA1	1.32287	40.7922	AW538199, FRA-1	FOS-like antigen 1	FOSL1	Nucleus	transcription regulator		8061	14283	25445
FTH1	2.59793	1.29278	AL022624, AL033366, APOFERRITIN H CHAIN, FERRITIN H, FERRITIN H CHAIN, Ferritin heavy chain, Ferritin subunit H, FHC, FTH, FTHL6, H FERRITIN, Hcf, MFH, MGC104426, PIG15, PLIF	ferritin, heavy polypeptide 1	FTH1	Cytoplasm	enzyme		2495	14319	25319
FTL	2.03744	1.29278	FERRITIN LIGHT CHAIN, Ftl1, Ftl2, L-FERRITIN, MGC71996	ferritin, light polypeptide	FTL	Cytoplasm	other		2512	14337	29292
GCLC	1.70837	2.07926	D9Wsu168e, Gamma Glutamyl Cysteine Synthetase Light Subunit, Gamma Glutamylcysteine Synthetase, Gamma glutamylcysteine synthetase heavy subunit, GAMMA-GCS, GAMMA-GCSH, Gcl, GCS, GCS, Catalytic, GCS-HS, GCSH, Ggcs-hs, GLCL, GLCL-H, GLCLC, MGC93096	glutamate-cysteine ligase, catalytic subunit	GCLC	Cytoplasm	enzyme		2729	14629	25283
GCLM	1.38537	20.6673	Gamma gclm, Gamma glutamylcysteine synthase (regulatory), GAMMA GLUTAMYLCYSTEINE SYNTHETASE, Gcs Ls, Gcs, Regulatory, GCS-L, GCS1, Gcslc, GLCLR, glutamat-cystein ligase, regulatory subunit	glutamate-cysteine ligase, modifier subunit	GCLM	Cytoplasm	enzyme		2730	14630	29739
GPX2	-1.42936	20.6673	GI-GPx, GPRP, GPX-GI, GSHPx-2, GSHPX-GI	glutathione peroxidase 2 (gastrointestinal)	GPX2	Cytoplasm	enzyme		2877	14776	29326
GSK3&beta;	1.8401	2.07926	7330414F15Rik, 8430431H08Rik, C86142, GSK-3, GSK-3BETA, Tpk1	glycogen synthase kinase 3 beta	GSK3B	Nucleus	kinase	enzastaurin	2932	56637	84027
GSR	2.79203	0.44703	AI325518, D8Ertd238e, GLUTATHIONE REDUCTASE, Gr, Gr-1, Gred, GRX, MGC78522	glutathione reductase	GSR	Cytoplasm	enzyme		2936	14782	116686
GST			Glutathione s-transferase			Unknown	complex
HERPUD1	-1.6984	26.4557	HERP, KIAA0025, Mif1, SUP	homocysteine-inducible, endoplasmic reticulum stress-inducible, ubiquitin-like domain member 1	HERPUD1	Cytoplasm	other		9709	64209	85430
HIP2			AW492011, D5Ertd601e, E2-25K, Hip2_predicted, HYPG, LIG, UBE2K	huntingtin interacting protein 2		Cytoplasm	transcription regulator		3093	53323	289623
HO-1	9.3448	0	bK286B10, D8Wsu38e, HEME OXYGENASE (DECYCLIZING) 1, HEME OXYGENASE-1, Hemox, Heox, HEOXG, Hmox, HO-1, Hsp32	heme oxygenase (decycling) 1	HMOX1	Cytoplasm	enzyme	tin mesoporphyrin	3162	15368	24451
HSP22/40/90						Unknown	group
JNK1/2			JNK1/2			Unknown	group
Jun			JUN			Unknown	group
KEAP1	1.70581	2.07926	INRF2, KIAA0132, KLHL19, MGC10630, MGC1114, MGC20887, MGC4407, MGC9454, mKIAA0132	kelch-like ECH-associated protein 1	KEAP1	Cytoplasm	transcription regulator		9817	50868	117519
Keap1-Nrf2						Unknown	complex
MEK1/2			Mkk 1/2			Unknown	group
MEK5			AI324775, AI428457, HsT17454, MAP kinase kinase 5, MAPKK5, MEK5, MKK5, PRKMK5	mitogen-activated protein kinase kinase 5		Cytoplasm	kinase		5607	23938	29568
MEKK	1.21537	20.6673	MAPK, MAPKKK1, MEK KINASE, MEKK, MEKK1, Raf	mitogen-activated protein kinase kinase kinase 1	MAP3K1	Cytoplasm	kinase		4214	26401	116667
MKK3/6			Mkk3/6 (mitogen activated protein kinase kinase 3/6), MKK3/MKK6			Unknown	group
MKK4/7			MKK4/7			Unknown	group
MRP1			ABC29, ABCC, Abcc1a, Abcc1b, Avcc1a, DKFZp686N04233, DKFZp781G125, GS-X, Mdrap, MRP, MRP1	ATP-binding cassette, sub-family C (CFTR/MRP), member 1		Plasma Membrane	transporter		4363	17250	24565
NQO						Unknown	group
NRF2			AI194320, NRF2	nuclear factor (erythroid-derived 2)-like 2		Nucleus	transcription regulator		4780	18024	83619
p38 MAPK			CRK1, CSBP, CSBP1, CSBP2, CSPB1, EXIP, Hog, MAPK p38, MGC102436, MGC105413, MXI2, P38, P38 KINASE, P38 Map Kinase, p38 Mapk alpha, P38-ALPHA, p38-RK, p38/Hog1, p38/Mpk2, P38/RK, p38a, p38Hog, p38MAPK, PRKM14, PRKM15, RK, SAPK2A	mitogen-activated protein kinase 14		Cytoplasm	kinase	SCIO-469, RO-3201195	1432	26416	81649
PERK	1.5131	15.5629	AI427929, DKFZp781H1925, PEK, PERK, WRS	eukaryotic translation initiation factor 2-alpha kinase 3	EIF2AK3	Cytoplasm	kinase		9451	13666	29702
PI3K			Pi 3-kinase			Unknown	complex
PKC			Cnpkc, Pkc, PKC protein, Pkm, Protein kinase c			Unknown	group
PPIB	1.49255	5.19491	AA408962, AA553318, AI844835, CPHN2, Cy-Lp, CYCLOPHILIN-B, CyP-20b, CYP-S1, CYPB, MGC14109, MGC2224, SCYLP	peptidylprolyl isomerase B (cyclophilin B)	PPIB	Cytoplasm	enzyme		5479	19035	64367
PRDX1	1.82285	3.37367	ENHANCER PROTEIN, Hbp23, MGC108617, MSP23, NKEFA, OSF-3, PAG, PAGA, PAGB, PRX I, PRX1, TDPX2, TDX2, TPx-A, TPX2	peroxiredoxin 1	PRDX1	Cytoplasm	enzyme		5052	18477	117254
PSM						Unknown	group
PTPLAD1	1.44308	7.74949	4930523M17RIK, AW742319, B-IND1, FLJ90376, HSPC121, MGC25483	protein tyrosine phosphatase-like A domain containing 1	PTPLAD1	Cytoplasm	other		51495	57874
Ras			p21 Ras, p21 Ras protein, Ras protein			Unknown	group
Roc1	1.20857	20.6673	1500002P15Rik, AA517855, BA554C12.1, HRT1, MGC116275, MGC13357, MGC1481, RNF75, ROC1	ring-box 1	RBX1	Cytoplasm	enzyme		9978	56438	300084
small MAF			MAF			Unknown	group
SOD			copper-zinc superoxide dismutase, Cu,Zn-SOD, Cu-Zn superoxide dismutase, cuprein, cytocuprein, erythrocuprein, Fe-SOD, ferrisuperoxide dismutase, hemocuprein, hepatocuprein, Mn-SOD, Sod protein, SOD-1, SOD-2, SOD-3, SOD-4, SODF, SODS, superoxidase dismuta			Unknown	group
SQSTM1	3.25296	0.288649	A170, OSF-6, Osi, OSIL, Oxidative Stress Protein, p60, P62, p62B, PDB3, Pkc zeta interacting protein, STAP, Ubiquitin-binding protein a, ZIP, ZIP3	sequestosome 1	SQSTM1	Cytoplasm	transcription regulator		8878	18412	113894
SR-BI	-1.14858	40.7922	AI120173, CD36, CD36L1, CLA-1, D5Ertd460e, HDL Receptor, MGC138242, mSR-BI, Scavenger receptor class b1, SR-B1, SR-BI	scavenger receptor class B, member 1	SCARB1	Plasma Membrane	transporter		949	20778	25073
STIP1	2.21223	0.744184	HOP, IEF-SSP-3521, mSTI1, P60, STI1, STI1L	stress-induced-phosphoprotein 1 (Hsp70/Hsp90-organizing protein)	STIP1	Cytoplasm	other		10963	20867	192277
TAK1			B430101B05, C87327, Map3k7_predicted, TAK1, Tgf beta Activated Kinase1, TGF1A	mitogen-activated protein kinase kinase kinase 7		Cytoplasm	kinase		6885	26409	313121
TRXR1	2.69065	0.44703	GRIM-12, KM 102 DERIVED REDUCTASE LIKE FACTOR, MGC9145, MGC93353, Tgr, Thioredoxin reductase, TR, TR1, TRXR1, TXNR	thioredoxin reductase 1	TXNRD1	Cytoplasm	enzyme		7296	50493	58819
TXN	1.77899	3.37367	ADF, AW550880, DKFZp686B1993, EOSINOPHIL CYTOTOXICITY FACTOR, MGC151960, MGC61975, THIOREDOXIN, TRX, TRX1, Txn1	thioredoxin	TXN	Cytoplasm	enzyme		7295	22166	116484
UB2R1	1.47878	5.19491	AI327276, E2-CDC34, UBC3, UBE2R1, Ubiquitin conjugating enzyme e2-32	cell division cycle 34 homolog (S. cerevisiae)	CDC34	Nucleus	enzyme		997	216150
UBB	-1.10986	42.5486	AL033289, FLJ25987, Loc192255, MGC8385, Polyubiquitin ub2, Ubb2, UBC, UBIQUITIN, UBIQUITIN B	ubiquitin B	UBB	Cytoplasm	other		7314	22187	192255
UGT	2.47702	0.44703	AI327289, Had-1, Sfc8, UGALT, UGAT, UGT, UGT1, UGT2, UGTL	solute carrier family 35 (UDP-galactose transporter), member A2	SLC35A2	Cytoplasm	transporter		7355	22232
USP14	1.46668	7.74949	2610005K12Rik, AW107924, ax, C78769, MGC95160, TGT, Ubiquitin specific protease 14	ubiquitin specific peptidase 14 (tRNA-guanine transglycosylase)	USP14	Cytoplasm	peptidase		9097	59025	291796
VCP	2.01763	1.29278	3110001E05, CDC48, IBMPFD, MGC131997, MGC148092, MGC8560, P97, P97 kinase, p97/VCP, Ter atpase, TERA, TRANSITIONAL ENDOPLASMIC RETICULUM ATPASE, XSG7	valosin-containing protein	VCP	Cytoplasm	enzyme		7415	269523	116643

## Sheet: insulin receptor action
© 2000-2007 Ingenuity Systems, Inc. All rights reserved.
Name	Fold Change	False Discovery Rate (q-value)	Synonyms	Description	Affymetrix/HUGO Gene Symbol			Location	Family	Drugs	Entrez Gene ID for Human	Entrez Gene ID for Mouse	Entrez Gene ID for Rat
IRS1	-5.4	0	G972R, HIRS-1, IRS1IRM	insulin receptor substrate 1	IRS1			Cytoplasm	other		3667	16367	25467
GAB1	-2.9	0.288649	AA408973, AW107238, Gab1, Gab1_predicted, GRB2-ASSOCIATED BINDER-1	GRB2-associated binding protein 1	226002_at			Cytoplasm	other		2549	14388	361388
SGK	-1.8	7.74949	Serum/Glucocorticoid Regulated Serine/Threonine Protein Kinase, SGK1	serum/glucocorticoid regulated kinase	SGK			Cytoplasm	kinase		6446	20393	29517
TC10	-1.5	15.5629	ARHQ, RASL7A, Rhot, TC10, TC10 BETA, TC10A, Tc10alpha	ras homolog gene family, member Q	RHOQ			Plasma Membrane	enzyme		23433	104215	85428
JNK1	-1.4	15.5629	AI849689, C-JUN N-TERMINAL KINASE1, JNK, JNK1, JNK1 ALPHA, Jnk1 p46 isoform, JNK1 PROTEIN KINASE, JNK1A2, JNK21B1/2, p46JNK1, p46JNK1 ALPHA, PRKM8, SAPK1, Sapk gamma, SAPK P46, SAPK1/JNK, STRESS-ACTIVATED PROTEIN KINASE-LIKE KINASE	mitogen-activated protein kinase 8	MAPK8			Cytoplasm	kinase	aplidine	5599	26419	116554
GRB10	-1.3	32.4514	5730571D09Rik, AI325020, GRB-IR, IRBP, KIAA0207, MEG1, mKIAA0207, RGD1566234_predicted, RSS	growth factor receptor-bound protein 10	GRB10			Cytoplasm	other		2887	14783	498416
TSC1	-1.2	38.3328	HAMARTIN, KIAA0243, LAM, MGC86987, mKIAA0243, TSC	tuberous sclerosis 1	TSC1			Cytoplasm	other		7248	64930	60445
GLUT4	-1.2	32.4514	Gef, GLUT-4, MGC93607	solute carrier family 2 (facilitated glucose transporter), member 4	SLC2A4			Plasma Membrane	transporter		6517	20528	25139
Fyn	-1	48.6564	AI448320, AW552119, B-FYN, C-FYN, FynT, MGC45350, MGC115870, p59 Fyn B, p59FYN, SLK, SRC-LIKE KINASE, SYN	FYN oncogene related to SRC, FGR, YES	243006_at			Plasma Membrane	kinase	dasatinib	2534	14360	25150
Insulin receptor	1.2	20.6673	4932439J01Rik, ALPHA SUBUNIT INSULIN RECEPTOR, CD220, D630014A15Rik, HHF5, INSULIN RECEPTOR, INSULIN RECEPTOR B, Insulin receptor beta, INSULIN RECEPTOR KINASE, INSULIN RPTK, IR, IR ALPHA, IR Beta, IR-B, IRK	insulin receptor	226450_at			Plasma Membrane	kinase	insulin, insulin aspart, insulin glulisine, insulin lispro, insulin glargine	3643	16337	24954
CIP4/2	1.3	11.3205	AI646975, CIP4, Cip4/2, HSTP, STOT, STP	thyroid hormone receptor interactor 10	TRIP10			Cytoplasm	other		9322	106628	116717
AFX	1.4	11.3205	AFX, AFX1, Afxh, MGC117660, MGC120490, MLLT7, RGD1561201_predicted	forkhead box O4	MLLT7			Nucleus	transcription regulator		4303	54601	302415
Cbl	1.4	7.74949	4732447J05Rik, C-CBL, CBL2, CBLA, LOC283153, p120 Cbl, RGD1561386_predicted, RNF55	Cas-Br-M (murine) ecotropic retroviral transforming sequence	CBL			Nucleus	transcription regulator		867	12402	500985
PDK1	1.4	20.6673	MGC20087, MGC35290, Pdk1, PkB-like, PkB-like 1, PRO0461	3-phosphoinositide dependent protein kinase-1	PDPK1			Cytoplasm	kinase		5170	18607	81745
PTP1B	1.5	11.3205	MGC93562, PROTEIN-TYROSINE PHOSPHATASE, PTP, PTP-1B, PTP-HA2, PTP1B ALPHA, PTP1BB, Ptpase 1, PTPASE 1B, PTPASE HA2	protein tyrosine phosphatase, non-receptor type 1	PTPN1			Cytoplasm	phosphatase		5770	19246	24697
Syntaxin	1.5	11.3205	p35-2, STX4A, SYN4, SYNTAXIN 4	syntaxin 4	STX4			Plasma Membrane	transporter		6810	20909	81803
eIF4E	1.5	11.3205	CAP-BINDING PROTEIN, CBP, Eif4e-ps, EIF4E1, EIF4EL1, EIF4F, IF4E, MGC103177, MGC111573, MGC134278, MGC93265	eukaryotic translation initiation factor 4E	EIF4E			Cytoplasm	translation regulator		1977	13684	117045
c-Raf	1.6	5.19491	6430402F14Rik, AA990557, BB129353, C-RAF, C-RAF1, D830050J10Rik, MGC102375, MURINE LEUKEMIA VIRAL ONCOGENE HOMOLOG1, Raf, RAF KINASE, v-Raf	v-raf-1 murine leukemia viral oncogene homolog 1	RAF1			Cytoplasm	kinase	sorafenib	5894	110157	24703
4E-BP1	1.9	5.19491	4E-BP1, AA959816, BP-1, Eukaryotic translation initiation factor 4e binding protein 1, MGC4316, PHAS-I, PHAS1	eukaryotic translation initiation factor 4E binding protein 1	EIF4EBP1			Cytoplasm	translation regulator		1978	13685	116636
C3G	1.9	2.07926	4932418O06Rik, C3G, C3G-1, C3G-2, DKFZp781P1719, GRF2	Rap guanine nucleotide exchange factor (GEF) 1	RAPGEF1			Cytoplasm	other		2889	107746	63881
Hormone-sensitive lipase	1.9	7.74949	Hormone-sensitive Lipase, HSL, LHS, Neutral ce hydrolase	lipase, hormone-sensitive	LIPE			Cytoplasm	enzyme		3991	16890	25330
mTOR	2.1	1.29278	2610315D21Rik, AI327068, Flat, Flat-Top, FLJ44809, FRAP, FRAP2, FRB, MGC118056, MTOR, RAFT1, RAPT1	FK506 binding protein 12-rapamycin associated protein 1	FRAP1			Nucleus	kinase	AP23573, temsirolimus, tacrolimus, everolimus	2475	56717	56718
ATP citrate lyase	2.1	0.44703	A730098H14RIK, ACL, ATP CITRATE LYASE, ATPCL, AW538652, Cce, CITRATE LYASE, CLATP, MGC124629	ATP citrate lyase	ACLY			Cytoplasm	enzyme		47	104112	24159
SHC	2.4	0.44703	FLJ26504, P66, p52SHC, p66SHC, SHC, Shc (46 kDa isoform), Shc p52, SHC P66, Shc p52 isoform, SHC P66 ISOFORM, SHCA	SHC (Src homology 2 domain containing) transforming protein 1	SHC1			Cytoplasm	other		6464	20416	85385
LAR	2.8	3.37367	AA591035, FLJ43335, FLJ45062, FLJ45567, LAR, Lar ptp2b, LARFN5C, LARS	protein tyrosine phosphatase, receptor type, F	PTPRF			Plasma Membrane	phosphatase		5792	19268	360406
SOCS3	7.1	3.37367	ATOD4, CIS3, Cish3, EF-10, MGC71791, SSI-3, SUPPRESSOR OF CYTOKINE SIGNALING-3	suppressor of cytokine signaling 3	SOCS3			Cytoplasm	other		9021	12702	89829
AKT			Akt protein, AKT/PKB, Akt/pkb protein, B/Akt, Pkb, Protein Kinase B, Protein kinase B protein, Protein kinase B/akt, RAC, RAC-PK, Rac/Pkb					Unknown	group
AMP			5'-adenylic acid, 5'-AMP, 61-19-8, adenosine monophosphate, C10H14N5O7P, [(2R,3R,4R,5R)-5-(6-aminopurin-9-yl)-3,4-dihydroxy-oxolan-2-yl]methoxyphosphonic acid					Unknown	chemical - endogenous mammalian
ATP			56-65-5, 9-beta-D-arabinofuranosyladenine 5'-triphosphate, adenosine 5'-(tetrahydrogen triphosphate), adenosine triphosphate, ATP4-, C10H16N5O13P3, [[[(2R,3R,4R,5R)-5-(6-aminopurin-9-yl)-3,4-dihydroxy-oxolan-2-yl]methoxy-hydroxy-phosphoryl]oxy-hydroxy-pho					Unknown	chemical - endogenous mammalian
BAD			AI325008, BBC2, BCL2L8, MGC72439	BCL2-antagonist of cell death				Cytoplasm	other		572	12015	64639
cAMP			(1S,6R,8R,9R)-8-(6-aminopurin-9-yl)-3-hydroxy-3-oxo-2,4,7-trioxa-3&lambda;<sup>5</sup>-phosphabicyclo[4.3.0]nonan-9-ol, 3',5'-cyclic AMP, 60-92-4, adenosine 3',5'-phosphate, adenosine cyclic 3',5'-monophosphate, C10H12N5O6P, cAMP, cyclic adenosine monopho					Unknown	chemical - endogenous mammalian
CRK			CRK					Unknown	group
eIF2B								Unknown	complex
ENaC								Unknown	complex
ERK1/2								Unknown	group
FKHR								Unknown	group
FKHRL1			1110048B16RIK, 2010203A17RIK, AF6q21, C76856, DKFZp781A0677, Fkhr2, FKHRL1, FKHRL1P2, FOXO2, FOXO3A, Foxo3a_predicted, MGC12739, MGC31925	forkhead box O3				Nucleus	transcription regulator		2309	56484	294515
Glucose			50-99-7, (3R,4S,5S,6R)-6-(hydroxymethyl)oxane-2,3,4,5-tetrol, C6H12O6, D-glucose, dextrose, glucose, sugar					Unknown	chemical - endogenous mammalian
GRB2			AA408164, ASH, EGFRBP-GRB2, GRAB2, Grb3-3, MGC108668, MST084, MSTP084	growth factor receptor-bound protein 2				Cytoplasm	other		2885	14784	81504
GSK3			Glycogen synthase kinase 3, GSK3 ALPHA/BETA					Unknown	group
GYS			glycogen (starch) synthetase, Glycogen(starch) synthase, Gs, Gys, UDP-glucose-glycogen glucosyltransferase, UDP-glycogen synthase, UDPG-glycogen synthetase, UDPG-glycogen transglucosylase, UDPglucose:glycogen 4-alpha-D-glucosyltransferase, uridine diphosp					Unknown	group
Insulin			C-peptide					Unknown	group
IRS			INSULIN RECEPTOR SUBSTRATE					Unknown	group
JAK1/2								Unknown	group
MEK1/2			Mkk 1/2					Unknown	group
NCK			6330586M15Rik, D230010O13RIK, MGC12668, NCK, NCK ALPHA, Nck1, Nck1_predicted, p47Nck	NCK adaptor protein 1				Cytoplasm	kinase		4690	17973	300955
p70 S6K			p70 S6 Kinase, S6K					Unknown	group
PDE3B			9830102A01RIK, AI847709, cAMP-Dependent 3',5'-Cyclic Phosphodiesterase, cGIPDE1, Cgmp-inhibited 3',5'-cyclic phosphodiesterase b, HcGIP1, Phosphodiesterase 3b	phosphodiesterase 3B, cGMP-inhibited				Cytoplasm	enzyme	dyphylline, nitroglycerin, medorinone, aminophylline, cilostazol, dipyridamole, amrinone, tolbutamide, theophylline, pentoxifylline	5140	18576	29516
PI3K			Pi 3-kinase					Unknown	complex
PIP2			1,2-diacyl-sn-glycero-3-phospho-(1'-myo-inositol-4',5'-bisphosphate), 1-phosphatidyl-1D-myo-inositol 4,5-bisphosphate, C11H19O19P3R2					Unknown	chemical - endogenous mammalian
PIP3			PI(3,4,5)P3, PtdIns(3,4,5)P3					Unknown	chemical - endogenous mammalian
PKA			A-Kinase, cAMP-dependent protein kinase, Pka protein, PROTEIN KINASE A					Unknown	complex
PKC (&lambda;,&zeta;)			Apkc, PKC (&lambda;,&zeta;), PKC (lambda, zeta), Pkc zeta/lambda					Unknown	group
PP1								Unknown	group
PTEN			2310035O07RIK, A130070J02Rik, AI463227, BZS, MGC11227, MHAM, Mmac, MMAC1, MUTATED IN MULTIPLE ADVANCED CANCERS, mutated in multiple advanced cancers 1, PTEN1, TEP1	phosphatase and tensin homolog (mutated in multiple advanced cancers 1)				Cytoplasm	phosphatase		5728	19211	50557
Raptor			4932417H02Rik, KIAA1303, mKIAA1303, RGD1311784_predicted, RP24-225K18.1	raptor				Cytoplasm	other		57521	74370	287871
Ras			p21 Ras, p21 Ras protein, Ras protein					Unknown	group
SHIP								Unknown	group
SHP2			2700084A17Rik, AW536184, BPTP3, CFC, MGC14433, Noonan syndrome 1, NS1, PTP-1D, PTP2C, SAP-2, SH-PTP2, SH-PTP3, SHP-2, Src homology protein 2, SYP	protein tyrosine phosphatase, non-receptor type 11 (Noonan syndrome 1)				Cytoplasm	phosphatase		5781	19247	25622
SOS								Unknown	group
Synip			6030470M02RIK, FLJ16496, MGC149829, MGC50337, Munc-18c, Stxbp4_predicted, SYNIP, Synthaxin binding protein 4	syntaxin binding protein 4				Cytoplasm	other		252983	20913	303443
Tsc1-Tsc2								Unknown	complex
TSC2			FLJ43106, LAM, Rc, Tcs2, TSC4, TUBERIN	tuberous sclerosis 2				Cytoplasm	other		7249	22084	24855
VAMP2			FLJ11460, mVam2, RATVAMPB, RATVAMPIR, SYB, SYB2, SYNAPTOBREVIN 2, Vamp ii	vesicle-associated membrane protein 2 (synaptobrevin 2)				Plasma Membrane	other	botulism toxin	6844	22318	24803
