# Supplementary material for: Dysregulation of Mitochondrial Dynamics and the Muscle Transcriptome in ICU Patients Suffering from Sepsis Induced Multiple Organ Failure
Source: PLoS One. 2008 Nov 10;3(11):e3686. doi: 10.1371/journal.pone.0003686 (PMC2579334; doi:10.1371/journal.pone.0003686)
Supplement: Supplemental data sheet S5 — Canonical Network lists. (0.06 MB XLS) [file pone.0003686.s010.xls]

## Sheet: insulin signaling
© 2000-2007 Ingenuity Systems, Inc. All rights reserved.
Name	Fold Change	False Discovery Rate (q-value)	Synonyms	Description	Affymetrix/HUGO Gene Symbol			Location	Family	Drugs	Entrez Gene ID for Human	Entrez Gene ID for Mouse	Entrez Gene ID for Rat
IRS1	-5.4	0	G972R, HIRS-1, IRS1IRM	insulin receptor substrate 1	IRS1			Cytoplasm	other		3667	16367	25467
GAB1	-2.9	0.288649	AA408973, AW107238, Gab1, Gab1_predicted, GRB2-ASSOCIATED BINDER-1	GRB2-associated binding protein 1	226002_at			Cytoplasm	other		2549	14388	361388
SGK	-1.8	7.74949	Serum/Glucocorticoid Regulated Serine/Threonine Protein Kinase, SGK1	serum/glucocorticoid regulated kinase	SGK			Cytoplasm	kinase		6446	20393	29517
TC10	-1.5	15.5629	ARHQ, RASL7A, Rhot, TC10, TC10 BETA, TC10A, Tc10alpha	ras homolog gene family, member Q	RHOQ			Plasma Membrane	enzyme		23433	104215	85428
JNK1	-1.4	15.5629	AI849689, C-JUN N-TERMINAL KINASE1, JNK, JNK1, JNK1 ALPHA, Jnk1 p46 isoform, JNK1 PROTEIN KINASE, JNK1A2, JNK21B1/2, p46JNK1, p46JNK1 ALPHA, PRKM8, SAPK1, Sapk gamma, SAPK P46, SAPK1/JNK, STRESS-ACTIVATED PROTEIN KINASE-LIKE KINASE	mitogen-activated protein kinase 8	MAPK8			Cytoplasm	kinase	aplidine	5599	26419	116554
GRB10	-1.3	32.4514	5730571D09Rik, AI325020, GRB-IR, IRBP, KIAA0207, MEG1, mKIAA0207, RGD1566234_predicted, RSS	growth factor receptor-bound protein 10	GRB10			Cytoplasm	other		2887	14783	498416
TSC1	-1.2	38.3328	HAMARTIN, KIAA0243, LAM, MGC86987, mKIAA0243, TSC	tuberous sclerosis 1	TSC1			Cytoplasm	other		7248	64930	60445
GLUT4	-1.2	32.4514	Gef, GLUT-4, MGC93607	solute carrier family 2 (facilitated glucose transporter), member 4	SLC2A4			Plasma Membrane	transporter		6517	20528	25139
Fyn	-1	48.6564	AI448320, AW552119, B-FYN, C-FYN, FynT, MGC45350, MGC115870, p59 Fyn B, p59FYN, SLK, SRC-LIKE KINASE, SYN	FYN oncogene related to SRC, FGR, YES	243006_at			Plasma Membrane	kinase	dasatinib	2534	14360	25150
Insulin receptor	1.2	20.6673	4932439J01Rik, ALPHA SUBUNIT INSULIN RECEPTOR, CD220, D630014A15Rik, HHF5, INSULIN RECEPTOR, INSULIN RECEPTOR B, Insulin receptor beta, INSULIN RECEPTOR KINASE, INSULIN RPTK, IR, IR ALPHA, IR Beta, IR-B, IRK	insulin receptor	226450_at			Plasma Membrane	kinase	insulin, insulin aspart, insulin glulisine, insulin lispro, insulin glargine	3643	16337	24954
CIP4/2	1.3	11.3205	AI646975, CIP4, Cip4/2, HSTP, STOT, STP	thyroid hormone receptor interactor 10	TRIP10			Cytoplasm	other		9322	106628	116717
AFX	1.4	11.3205	AFX, AFX1, Afxh, MGC117660, MGC120490, MLLT7, RGD1561201_predicted	forkhead box O4	MLLT7			Nucleus	transcription regulator		4303	54601	302415
Cbl	1.4	7.74949	4732447J05Rik, C-CBL, CBL2, CBLA, LOC283153, p120 Cbl, RGD1561386_predicted, RNF55	Cas-Br-M (murine) ecotropic retroviral transforming sequence	CBL			Nucleus	transcription regulator		867	12402	500985
PDK1	1.4	20.6673	MGC20087, MGC35290, Pdk1, PkB-like, PkB-like 1, PRO0461	3-phosphoinositide dependent protein kinase-1	PDPK1			Cytoplasm	kinase		5170	18607	81745
PTP1B	1.5	11.3205	MGC93562, PROTEIN-TYROSINE PHOSPHATASE, PTP, PTP-1B, PTP-HA2, PTP1B ALPHA, PTP1BB, Ptpase 1, PTPASE 1B, PTPASE HA2	protein tyrosine phosphatase, non-receptor type 1	PTPN1			Cytoplasm	phosphatase		5770	19246	24697
Syntaxin	1.5	11.3205	p35-2, STX4A, SYN4, SYNTAXIN 4	syntaxin 4	STX4			Plasma Membrane	transporter		6810	20909	81803
eIF4E	1.5	11.3205	CAP-BINDING PROTEIN, CBP, Eif4e-ps, EIF4E1, EIF4EL1, EIF4F, IF4E, MGC103177, MGC111573, MGC134278, MGC93265	eukaryotic translation initiation factor 4E	EIF4E			Cytoplasm	translation regulator		1977	13684	117045
c-Raf	1.6	5.19491	6430402F14Rik, AA990557, BB129353, C-RAF, C-RAF1, D830050J10Rik, MGC102375, MURINE LEUKEMIA VIRAL ONCOGENE HOMOLOG1, Raf, RAF KINASE, v-Raf	v-raf-1 murine leukemia viral oncogene homolog 1	RAF1			Cytoplasm	kinase	sorafenib	5894	110157	24703
4E-BP1	1.9	5.19491	4E-BP1, AA959816, BP-1, Eukaryotic translation initiation factor 4e binding protein 1, MGC4316, PHAS-I, PHAS1	eukaryotic translation initiation factor 4E binding protein 1	EIF4EBP1			Cytoplasm	translation regulator		1978	13685	116636
C3G	1.9	2.07926	4932418O06Rik, C3G, C3G-1, C3G-2, DKFZp781P1719, GRF2	Rap guanine nucleotide exchange factor (GEF) 1	RAPGEF1			Cytoplasm	other		2889	107746	63881
Hormone-sensitive lipase	1.9	7.74949	Hormone-sensitive Lipase, HSL, LHS, Neutral ce hydrolase	lipase, hormone-sensitive	LIPE			Cytoplasm	enzyme		3991	16890	25330
mTOR	2.1	1.29278	2610315D21Rik, AI327068, Flat, Flat-Top, FLJ44809, FRAP, FRAP2, FRB, MGC118056, MTOR, RAFT1, RAPT1	FK506 binding protein 12-rapamycin associated protein 1	FRAP1			Nucleus	kinase	AP23573, temsirolimus, tacrolimus, everolimus	2475	56717	56718
ATP citrate lyase	2.1	0.44703	A730098H14RIK, ACL, ATP CITRATE LYASE, ATPCL, AW538652, Cce, CITRATE LYASE, CLATP, MGC124629	ATP citrate lyase	ACLY			Cytoplasm	enzyme		47	104112	24159
SHC	2.4	0.44703	FLJ26504, P66, p52SHC, p66SHC, SHC, Shc (46 kDa isoform), Shc p52, SHC P66, Shc p52 isoform, SHC P66 ISOFORM, SHCA	SHC (Src homology 2 domain containing) transforming protein 1	SHC1			Cytoplasm	other		6464	20416	85385
LAR	2.8	3.37367	AA591035, FLJ43335, FLJ45062, FLJ45567, LAR, Lar ptp2b, LARFN5C, LARS	protein tyrosine phosphatase, receptor type, F	PTPRF			Plasma Membrane	phosphatase		5792	19268	360406
SOCS3	7.1	3.37367	ATOD4, CIS3, Cish3, EF-10, MGC71791, SSI-3, SUPPRESSOR OF CYTOKINE SIGNALING-3	suppressor of cytokine signaling 3	SOCS3			Cytoplasm	other		9021	12702	89829
AKT			Akt protein, AKT/PKB, Akt/pkb protein, B/Akt, Pkb, Protein Kinase B, Protein kinase B protein, Protein kinase B/akt, RAC, RAC-PK, Rac/Pkb					Unknown	group
AMP			5'-adenylic acid, 5'-AMP, 61-19-8, adenosine monophosphate, C10H14N5O7P, [(2R,3R,4R,5R)-5-(6-aminopurin-9-yl)-3,4-dihydroxy-oxolan-2-yl]methoxyphosphonic acid					Unknown	chemical - endogenous mammalian
ATP			56-65-5, 9-beta-D-arabinofuranosyladenine 5'-triphosphate, adenosine 5'-(tetrahydrogen triphosphate), adenosine triphosphate, ATP4-, C10H16N5O13P3, [[[(2R,3R,4R,5R)-5-(6-aminopurin-9-yl)-3,4-dihydroxy-oxolan-2-yl]methoxy-hydroxy-phosphoryl]oxy-hydroxy-pho					Unknown	chemical - endogenous mammalian
BAD			AI325008, BBC2, BCL2L8, MGC72439	BCL2-antagonist of cell death				Cytoplasm	other		572	12015	64639
cAMP			(1S,6R,8R,9R)-8-(6-aminopurin-9-yl)-3-hydroxy-3-oxo-2,4,7-trioxa-3&lambda;<sup>5</sup>-phosphabicyclo[4.3.0]nonan-9-ol, 3',5'-cyclic AMP, 60-92-4, adenosine 3',5'-phosphate, adenosine cyclic 3',5'-monophosphate, C10H12N5O6P, cAMP, cyclic adenosine monopho					Unknown	chemical - endogenous mammalian
CRK			CRK					Unknown	group
eIF2B								Unknown	complex
ENaC								Unknown	complex
ERK1/2								Unknown	group
FKHR								Unknown	group
FKHRL1			1110048B16RIK, 2010203A17RIK, AF6q21, C76856, DKFZp781A0677, Fkhr2, FKHRL1, FKHRL1P2, FOXO2, FOXO3A, Foxo3a_predicted, MGC12739, MGC31925	forkhead box O3				Nucleus	transcription regulator		2309	56484	294515
Glucose			50-99-7, (3R,4S,5S,6R)-6-(hydroxymethyl)oxane-2,3,4,5-tetrol, C6H12O6, D-glucose, dextrose, glucose, sugar					Unknown	chemical - endogenous mammalian
GRB2			AA408164, ASH, EGFRBP-GRB2, GRAB2, Grb3-3, MGC108668, MST084, MSTP084	growth factor receptor-bound protein 2				Cytoplasm	other		2885	14784	81504
GSK3			Glycogen synthase kinase 3, GSK3 ALPHA/BETA					Unknown	group
GYS			glycogen (starch) synthetase, Glycogen(starch) synthase, Gs, Gys, UDP-glucose-glycogen glucosyltransferase, UDP-glycogen synthase, UDPG-glycogen synthetase, UDPG-glycogen transglucosylase, UDPglucose:glycogen 4-alpha-D-glucosyltransferase, uridine diphosp					Unknown	group
Insulin			C-peptide					Unknown	group
IRS			INSULIN RECEPTOR SUBSTRATE					Unknown	group
JAK1/2								Unknown	group
MEK1/2			Mkk 1/2					Unknown	group
NCK			6330586M15Rik, D230010O13RIK, MGC12668, NCK, NCK ALPHA, Nck1, Nck1_predicted, p47Nck	NCK adaptor protein 1				Cytoplasm	kinase		4690	17973	300955
p70 S6K			p70 S6 Kinase, S6K					Unknown	group
PDE3B			9830102A01RIK, AI847709, cAMP-Dependent 3',5'-Cyclic Phosphodiesterase, cGIPDE1, Cgmp-inhibited 3',5'-cyclic phosphodiesterase b, HcGIP1, Phosphodiesterase 3b	phosphodiesterase 3B, cGMP-inhibited				Cytoplasm	enzyme	dyphylline, nitroglycerin, medorinone, aminophylline, cilostazol, dipyridamole, amrinone, tolbutamide, theophylline, pentoxifylline	5140	18576	29516
PI3K			Pi 3-kinase					Unknown	complex
PIP2			1,2-diacyl-sn-glycero-3-phospho-(1'-myo-inositol-4',5'-bisphosphate), 1-phosphatidyl-1D-myo-inositol 4,5-bisphosphate, C11H19O19P3R2					Unknown	chemical - endogenous mammalian
PIP3			PI(3,4,5)P3, PtdIns(3,4,5)P3					Unknown	chemical - endogenous mammalian
PKA			A-Kinase, cAMP-dependent protein kinase, Pka protein, PROTEIN KINASE A					Unknown	complex
PKC (&lambda;,&zeta;)			Apkc, PKC (&lambda;,&zeta;), PKC (lambda, zeta), Pkc zeta/lambda					Unknown	group
PP1								Unknown	group
PTEN			2310035O07RIK, A130070J02Rik, AI463227, BZS, MGC11227, MHAM, Mmac, MMAC1, MUTATED IN MULTIPLE ADVANCED CANCERS, mutated in multiple advanced cancers 1, PTEN1, TEP1	phosphatase and tensin homolog (mutated in multiple advanced cancers 1)				Cytoplasm	phosphatase		5728	19211	50557
Raptor			4932417H02Rik, KIAA1303, mKIAA1303, RGD1311784_predicted, RP24-225K18.1	raptor				Cytoplasm	other		57521	74370	287871
Ras			p21 Ras, p21 Ras protein, Ras protein					Unknown	group
SHIP								Unknown	group
SHP2			2700084A17Rik, AW536184, BPTP3, CFC, MGC14433, Noonan syndrome 1, NS1, PTP-1D, PTP2C, SAP-2, SH-PTP2, SH-PTP3, SHP-2, Src homology protein 2, SYP	protein tyrosine phosphatase, non-receptor type 11 (Noonan syndrome 1)				Cytoplasm	phosphatase		5781	19247	25622
SOS								Unknown	group
Synip			6030470M02RIK, FLJ16496, MGC149829, MGC50337, Munc-18c, Stxbp4_predicted, SYNIP, Synthaxin binding protein 4	syntaxin binding protein 4				Cytoplasm	other		252983	20913	303443
Tsc1-Tsc2								Unknown	complex
TSC2			FLJ43106, LAM, Rc, Tcs2, TSC4, TUBERIN	tuberous sclerosis 2				Cytoplasm	other		7249	22084	24855
VAMP2			FLJ11460, mVam2, RATVAMPB, RATVAMPIR, SYB, SYB2, SYNAPTOBREVIN 2, Vamp ii	vesicle-associated membrane protein 2 (synaptobrevin 2)				Plasma Membrane	other	botulism toxin	6844	22318	24803

## Sheet: nrf2 oxidative
© 2000-2007 Ingenuity Systems, Inc. All rights reserved.
Name	Fold Change	False Discovery Rate (q-value)	Synonyms	Description	Affymetrix/HUGO Gene Symbol	Location	Family	Drugs	Entrez Gene ID for Human	Entrez Gene ID for Mouse	Entrez Gene ID for Rat
Actin						Unknown	group
Actin-Nrf2						Unknown	complex
AFAR						Unknown	group
AKR			2610201A18Rik, Akr1a4, Akra, ALDEHYDE REDUCTASE, ALDR1, ALR, DD3, MGC12529, MGC1380	aldo-keto reductase family 1, member A1 (aldehyde reductase)		Cytoplasm	enzyme		10327	58810	78959
AKT	1.12289	32.4514	AKT, MGC99656, PKB, PKB ALPHA, PKB/AKT, PRKBA, Protein kinase B, RAC, RAC-ALPHA, Thymoma viral proto-oncogene 1	v-akt murine thymoma viral oncogene homolog 1	AKT1	Cytoplasm	kinase	enzastaurin	207	11651	24185
AOX1	3.96277	3.37367	AI196512, AI255253, ALDEHYDE OXIDASE, AO, AOH1, Aox-2, MGC13774, Moro, RO, XD	aldehyde oxidase 1	AOX1	Cytoplasm	enzyme		316	11761	54349
ASK1			7420452D20Rik, ASK, ASK1, MAPKKK5, MEKK5, MGC141518, MGC141519, RGD1306565_predicted	mitogen-activated protein kinase kinase kinase 5		Cytoplasm	kinase		4217	26408	365057
ATF4	-0.995015	48.6564	C/ATF, CREB-2, MGC96460, TAXREB67, TXREB	activating transcription factor 4 (tax-responsive enhancer element B67)	ATF4	Nucleus	transcription regulator		468	11911	79255
BACH1	2.13451	2.07926	6230421P05RIK, AI323795, Bach1_predicted, C21ORF41	BTB and CNC homology 1, basic leucine zipper transcription factor 1	BACH1	Nucleus	transcription regulator		571	12013	304127
c-Fos	-1.00406	48.6564	C-FOS, D12Rfj1, V-FOS	v-fos FBJ murine osteosarcoma viral oncogene homolog	FOS	Nucleus	transcription regulator		2353	14281	314322
c-MAF	-3.26206	0.288649	2810401A20Rik, A230108G15RIK, AW047063, C-MAF, Maf2, MGC71685	v-maf musculoaponeurotic fibrosarcoma oncogene homolog (avian)	229327_s_at	Nucleus	transcription regulator		4094	17132	54267
c-Raf	1.56433	5.19491	6430402F14Rik, AA990557, BB129353, C-RAF, C-RAF1, D830050J10Rik, MGC102375, MURINE LEUKEMIA VIRAL ONCOGENE HOMOLOG1, Raf, RAF KINASE, v-Raf	v-raf-1 murine leukemia viral oncogene homolog 1	RAF1	Cytoplasm	kinase	sorafenib	5894	110157	24703
CAT			2210418N07, Cas-1, CATALASE, Catalase1, Cs-1, MGC138422, MGC138424, RATCAT01, RATCATL	catalase		Cytoplasm	enzyme		847	12359	24248
CBP/p300			CBP			Unknown	group
CBR1	1.73505	5.19491	AW261796, Carbonyl Reductase, CBR, CR, hCBR1, MGC124927, Ocr	carbonyl reductase 1	CBR1	Cytoplasm	enzyme		873	12408	29224
CCT7	2.08335	0.744184	AA408524, AL022769, CCT-ETA, Cct7_predicted, Ccth, Cctz, Chaperonin subunit 7, MGC110985, Nip7-1, TCP-1-eta	chaperonin containing TCP1, subunit 7 (eta)	CCT7	Cytoplasm	other		10574	12468	297406
CLPP	1.12883	32.4514	AU019820, D17Wsu160e, LOC301117	ClpP caseinolytic peptidase, ATP-dependent, proteolytic subunit homolog (E. coli)	CLPP	Cytoplasm	peptidase		8192	53895	301117
CUL3			AI467304, AW146203, Cul3_predicted, mKIAA0617	cullin 3		Nucleus	enzyme		8452	26554	301555
Cul3-Roc1						Unknown	complex
CYP1A/2A/3A/4A/2C						Unknown	group
ElectophilesROS			oxygen and reactive oxygen species, reactive oxygen metabolites, ROI, ROS			Unknown	chemical toxicant
EPHX1	3.54555	0.288649	AI195553, Eph-1, EPHX, EPOX, Epoxide Hydrolase, EPXH1, MEH, MEH8	epoxide hydrolase 1, microsomal (xenobiotic)	EPHX1	Cytoplasm	peptidase		2052	13849	25315
ERK1/2						Unknown	group
ERK5	1.72683	2.07926	BMK, BMK1, ERK4, ERK5, Erk5-T, ERK7, PRKM7	mitogen-activated protein kinase 7	MAPK7	Cytoplasm	kinase		5598	23939	114509
ERP29	1.21896	15.5629	1200015M03Rik, 2810446M09Rik, AW209030, C12orf8, ERp28, ERp31, PDI-DB	endoplasmic reticulum protein 29	ERP29	Cytoplasm	transporter		10961	67397	117030
FKBP5	5.06538	2.07926	51kDa, AIG6, D17Ertd592e, Dit1, FKBP51, Fkbp51/54, FKBP54, MGC111006, P54, PPIase, Ptg-10	FK506 binding protein 5	FKBP5	Nucleus	enzyme		2289	14229	361810
FMO1	-1.35876	42.5486	Flavin-containing monooxygenase, RFMO1A	flavin containing monooxygenase 1	FMO1	Cytoplasm	enzyme		2326	14261	25256
FRA1	1.32287	40.7922	AW538199, FRA-1	FOS-like antigen 1	FOSL1	Nucleus	transcription regulator		8061	14283	25445
FTH1	2.59793	1.29278	AL022624, AL033366, APOFERRITIN H CHAIN, FERRITIN H, FERRITIN H CHAIN, Ferritin heavy chain, Ferritin subunit H, FHC, FTH, FTHL6, H FERRITIN, Hcf, MFH, MGC104426, PIG15, PLIF	ferritin, heavy polypeptide 1	FTH1	Cytoplasm	enzyme		2495	14319	25319
FTL	2.03744	1.29278	FERRITIN LIGHT CHAIN, Ftl1, Ftl2, L-FERRITIN, MGC71996	ferritin, light polypeptide	FTL	Cytoplasm	other		2512	14337	29292
GCLC	1.70837	2.07926	D9Wsu168e, Gamma Glutamyl Cysteine Synthetase Light Subunit, Gamma Glutamylcysteine Synthetase, Gamma glutamylcysteine synthetase heavy subunit, GAMMA-GCS, GAMMA-GCSH, Gcl, GCS, GCS, Catalytic, GCS-HS, GCSH, Ggcs-hs, GLCL, GLCL-H, GLCLC, MGC93096	glutamate-cysteine ligase, catalytic subunit	GCLC	Cytoplasm	enzyme		2729	14629	25283
GCLM	1.38537	20.6673	Gamma gclm, Gamma glutamylcysteine synthase (regulatory), GAMMA GLUTAMYLCYSTEINE SYNTHETASE, Gcs Ls, Gcs, Regulatory, GCS-L, GCS1, Gcslc, GLCLR, glutamat-cystein ligase, regulatory subunit	glutamate-cysteine ligase, modifier subunit	GCLM	Cytoplasm	enzyme		2730	14630	29739
GPX2	-1.42936	20.6673	GI-GPx, GPRP, GPX-GI, GSHPx-2, GSHPX-GI	glutathione peroxidase 2 (gastrointestinal)	GPX2	Cytoplasm	enzyme		2877	14776	29326
GSK3&beta;	1.8401	2.07926	7330414F15Rik, 8430431H08Rik, C86142, GSK-3, GSK-3BETA, Tpk1	glycogen synthase kinase 3 beta	GSK3B	Nucleus	kinase	enzastaurin	2932	56637	84027
GSR	2.79203	0.44703	AI325518, D8Ertd238e, GLUTATHIONE REDUCTASE, Gr, Gr-1, Gred, GRX, MGC78522	glutathione reductase	GSR	Cytoplasm	enzyme		2936	14782	116686
GST			Glutathione s-transferase			Unknown	complex
HERPUD1	-1.6984	26.4557	HERP, KIAA0025, Mif1, SUP	homocysteine-inducible, endoplasmic reticulum stress-inducible, ubiquitin-like domain member 1	HERPUD1	Cytoplasm	other		9709	64209	85430
HIP2			AW492011, D5Ertd601e, E2-25K, Hip2_predicted, HYPG, LIG, UBE2K	huntingtin interacting protein 2		Cytoplasm	transcription regulator		3093	53323	289623
HO-1	9.3448	0	bK286B10, D8Wsu38e, HEME OXYGENASE (DECYCLIZING) 1, HEME OXYGENASE-1, Hemox, Heox, HEOXG, Hmox, HO-1, Hsp32	heme oxygenase (decycling) 1	HMOX1	Cytoplasm	enzyme	tin mesoporphyrin	3162	15368	24451
HSP22/40/90						Unknown	group
JNK1/2			JNK1/2			Unknown	group
Jun			JUN			Unknown	group
KEAP1	1.70581	2.07926	INRF2, KIAA0132, KLHL19, MGC10630, MGC1114, MGC20887, MGC4407, MGC9454, mKIAA0132	kelch-like ECH-associated protein 1	KEAP1	Cytoplasm	transcription regulator		9817	50868	117519
Keap1-Nrf2						Unknown	complex
MEK1/2			Mkk 1/2			Unknown	group
MEK5			AI324775, AI428457, HsT17454, MAP kinase kinase 5, MAPKK5, MEK5, MKK5, PRKMK5	mitogen-activated protein kinase kinase 5		Cytoplasm	kinase		5607	23938	29568
MEKK	1.21537	20.6673	MAPK, MAPKKK1, MEK KINASE, MEKK, MEKK1, Raf	mitogen-activated protein kinase kinase kinase 1	MAP3K1	Cytoplasm	kinase		4214	26401	116667
MKK3/6			Mkk3/6 (mitogen activated protein kinase kinase 3/6), MKK3/MKK6			Unknown	group
MKK4/7			MKK4/7			Unknown	group
MRP1			ABC29, ABCC, Abcc1a, Abcc1b, Avcc1a, DKFZp686N04233, DKFZp781G125, GS-X, Mdrap, MRP, MRP1	ATP-binding cassette, sub-family C (CFTR/MRP), member 1		Plasma Membrane	transporter		4363	17250	24565
NQO						Unknown	group
NRF2			AI194320, NRF2	nuclear factor (erythroid-derived 2)-like 2		Nucleus	transcription regulator		4780	18024	83619
p38 MAPK			CRK1, CSBP, CSBP1, CSBP2, CSPB1, EXIP, Hog, MAPK p38, MGC102436, MGC105413, MXI2, P38, P38 KINASE, P38 Map Kinase, p38 Mapk alpha, P38-ALPHA, p38-RK, p38/Hog1, p38/Mpk2, P38/RK, p38a, p38Hog, p38MAPK, PRKM14, PRKM15, RK, SAPK2A	mitogen-activated protein kinase 14		Cytoplasm	kinase	SCIO-469, RO-3201195	1432	26416	81649
PERK	1.5131	15.5629	AI427929, DKFZp781H1925, PEK, PERK, WRS	eukaryotic translation initiation factor 2-alpha kinase 3	EIF2AK3	Cytoplasm	kinase		9451	13666	29702
PI3K			Pi 3-kinase			Unknown	complex
PKC			Cnpkc, Pkc, PKC protein, Pkm, Protein kinase c			Unknown	group
PPIB	1.49255	5.19491	AA408962, AA553318, AI844835, CPHN2, Cy-Lp, CYCLOPHILIN-B, CyP-20b, CYP-S1, CYPB, MGC14109, MGC2224, SCYLP	peptidylprolyl isomerase B (cyclophilin B)	PPIB	Cytoplasm	enzyme		5479	19035	64367
PRDX1	1.82285	3.37367	ENHANCER PROTEIN, Hbp23, MGC108617, MSP23, NKEFA, OSF-3, PAG, PAGA, PAGB, PRX I, PRX1, TDPX2, TDX2, TPx-A, TPX2	peroxiredoxin 1	PRDX1	Cytoplasm	enzyme		5052	18477	117254
PSM						Unknown	group
PTPLAD1	1.44308	7.74949	4930523M17RIK, AW742319, B-IND1, FLJ90376, HSPC121, MGC25483	protein tyrosine phosphatase-like A domain containing 1	PTPLAD1	Cytoplasm	other		51495	57874
Ras			p21 Ras, p21 Ras protein, Ras protein			Unknown	group
Roc1	1.20857	20.6673	1500002P15Rik, AA517855, BA554C12.1, HRT1, MGC116275, MGC13357, MGC1481, RNF75, ROC1	ring-box 1	RBX1	Cytoplasm	enzyme		9978	56438	300084
small MAF			MAF			Unknown	group
SOD			copper-zinc superoxide dismutase, Cu,Zn-SOD, Cu-Zn superoxide dismutase, cuprein, cytocuprein, erythrocuprein, Fe-SOD, ferrisuperoxide dismutase, hemocuprein, hepatocuprein, Mn-SOD, Sod protein, SOD-1, SOD-2, SOD-3, SOD-4, SODF, SODS, superoxidase dismuta			Unknown	group
SQSTM1	3.25296	0.288649	A170, OSF-6, Osi, OSIL, Oxidative Stress Protein, p60, P62, p62B, PDB3, Pkc zeta interacting protein, STAP, Ubiquitin-binding protein a, ZIP, ZIP3	sequestosome 1	SQSTM1	Cytoplasm	transcription regulator		8878	18412	113894
SR-BI	-1.14858	40.7922	AI120173, CD36, CD36L1, CLA-1, D5Ertd460e, HDL Receptor, MGC138242, mSR-BI, Scavenger receptor class b1, SR-B1, SR-BI	scavenger receptor class B, member 1	SCARB1	Plasma Membrane	transporter		949	20778	25073
STIP1	2.21223	0.744184	HOP, IEF-SSP-3521, mSTI1, P60, STI1, STI1L	stress-induced-phosphoprotein 1 (Hsp70/Hsp90-organizing protein)	STIP1	Cytoplasm	other		10963	20867	192277
TAK1			B430101B05, C87327, Map3k7_predicted, TAK1, Tgf beta Activated Kinase1, TGF1A	mitogen-activated protein kinase kinase kinase 7		Cytoplasm	kinase		6885	26409	313121
TRXR1	2.69065	0.44703	GRIM-12, KM 102 DERIVED REDUCTASE LIKE FACTOR, MGC9145, MGC93353, Tgr, Thioredoxin reductase, TR, TR1, TRXR1, TXNR	thioredoxin reductase 1	TXNRD1	Cytoplasm	enzyme		7296	50493	58819
TXN	1.77899	3.37367	ADF, AW550880, DKFZp686B1993, EOSINOPHIL CYTOTOXICITY FACTOR, MGC151960, MGC61975, THIOREDOXIN, TRX, TRX1, Txn1	thioredoxin	TXN	Cytoplasm	enzyme		7295	22166	116484
UB2R1	1.47878	5.19491	AI327276, E2-CDC34, UBC3, UBE2R1, Ubiquitin conjugating enzyme e2-32	cell division cycle 34 homolog (S. cerevisiae)	CDC34	Nucleus	enzyme		997	216150
UBB	-1.10986	42.5486	AL033289, FLJ25987, Loc192255, MGC8385, Polyubiquitin ub2, Ubb2, UBC, UBIQUITIN, UBIQUITIN B	ubiquitin B	UBB	Cytoplasm	other		7314	22187	192255
UGT	2.47702	0.44703	AI327289, Had-1, Sfc8, UGALT, UGAT, UGT, UGT1, UGT2, UGTL	solute carrier family 35 (UDP-galactose transporter), member A2	SLC35A2	Cytoplasm	transporter		7355	22232
USP14	1.46668	7.74949	2610005K12Rik, AW107924, ax, C78769, MGC95160, TGT, Ubiquitin specific protease 14	ubiquitin specific peptidase 14 (tRNA-guanine transglycosylase)	USP14	Cytoplasm	peptidase		9097	59025	291796
VCP	2.01763	1.29278	3110001E05, CDC48, IBMPFD, MGC131997, MGC148092, MGC8560, P97, P97 kinase, p97/VCP, Ter atpase, TERA, TRANSITIONAL ENDOPLASMIC RETICULUM ATPASE, XSG7	valosin-containing protein	VCP	Cytoplasm	enzyme		7415	269523	116643
